## RESEARCH ARTICLE

# Evaluation framework for facilitating the technology transfers of universities: Focusing on the perspective of technology donors

Jongyi Hong<sup>1</sup>, Jeonghwa Cha<sup>2</sup>, Bilegjargal G.<sup>3</sup>, Kyungbo Park<sup>3\*</sup>

**1** Institute for Research & Industry Cooperation, Pusan National University, Geumjeong-gu, Busan, Republic of Korea, **2** Department of Business Administration, Pusan National University, Geumjeong-gu, Busan, Republic of Korea, **3** Department of Business Administration, Andong National University, Andong, Gyeongsangbuk-do, Republic of Korea

\* [warning@anu.ac.kr](mailto:warning@anu.ac.kr)

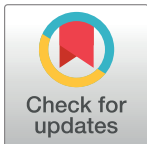

## Abstract

Technological innovation and preoccupation with new markets through technological innovation have become critical factors in achieving success in the global market. Currently, companies cannot develop and commercialize all technologies. Therefore, the importance of technology transfers is rapidly increasing. Technology transfer is a crucial strategy adopted by organizations to remain innovative and competitive. However, Korea's technology transfer rate is only 37.9%. In particular, the technology transfer rate from universities to companies is lower than that from government-funded research institutes in Korea. Although the fundamental approach for resolving barriers to technology transfer have been studied, previous research has been conducted from a narrow definition of technology transfer. Furthermore, previous research has focused on analyzing the success factors of technology transfer, presenting technology transfer processes, or conducting case studies. Therefore, it is necessary to develop a technology donor diagnosis framework based on CSFs (Critical Success Factors) to eliminate obstacles to technology transfers. To lower the barriers to technology transfers, it is necessary to develop a strategy for a successful technology transfer based on the diagnosis of technology donors. This study develops a diagnosis framework for universities from the perspective of technology donors, implements and tests the framework using case studies, and proposes strategies for each stage of technology transfer growth. The framework is able to assess multidimensional perspectives, because CSFs and PMs were extracted based on BSC. Furthermore, by comparing the perspectives score of technology donors in different universities, technology donors can identify the areas in which each university is lacking in its current situation. Multidimensional diagnosis and aggregation score of technology donors offer to extract optimal CSFs for technology transfer activation for each growth stage.

## OPEN ACCESS

**Citation:** Hong J, Cha J, G. B, Park K (2023) Evaluation framework for facilitating the technology transfers of universities: Focusing on the perspective of technology donors. PLoS ONE 18(12): e0293951. <https://doi.org/10.1371/journal.pone.0293951>

**Editor:** Claudia Noemi González Brambila, Instituto Tecnológico Autónomo de México, MEXICO

**Received:** February 2, 2023

**Accepted:** October 23, 2023

**Published:** December 14, 2023

**Copyright:** © 2023 Hong et al. This is an open access article distributed under the terms of the [Creative Commons Attribution License](https://creativecommons.org/licenses/by/4.0/), which permits unrestricted use, distribution, and reproduction in any medium, provided the original author and source are credited.

**Data Availability Statement:** All data files are available from the figshare repository ([https://figshare.com/articles/dataset/Raw\\_data\\_xlsx/22331182](https://figshare.com/articles/dataset/Raw_data_xlsx/22331182)).

**Funding:** The author(s) received no specific funding for this work.

**Competing interests:** The authors have declared that no competing interests exist.

## Section 1: Introduction

The effective acquisition and utilization of new technologies are essential aspects of corporate success and critical determinants of corporate competitiveness [1]. The radical development of technology is rapidly changing the innovation rates for both products and services [2]. A company can lead the global market by securing efficiency in a series of processes, from the start of research and development (R&D) to commercialization [3]. Technological innovation and preoccupation with new markets through technological innovation have become critical factors in achieving success in the global market. Currently, companies cannot develop and commercialize all technologies. Therefore, the importance of technology transfers is rapidly increasing [4]. Technology transfer is a crucial strategy adopted by organizations to remain innovative and competitive. The importance of technology transfer lies in its ability to promote innovation and enhance competitiveness. By transferring knowledge, expertise, and technology from one organization to another, technology transfer can facilitate the development of new products and services, improve production processes, and create new markets. Furthermore, technology transfer can help organizations stay at the forefront of their industries and adapt to changing market conditions. In this way, technology transfer plays a vital role in driving economic growth and promoting societal progress. More than 50% of new product development and service innovations occur through technology transfers [5]. The market launch of new products and services based on technology transfers provides an opportunity for a company to improve its profit and market share [6]. As the importance of technology transfers increases, technology transfers in universities likewise increases [4]. In particular, as the contribution of universities to technology transfers increases, the role of universities as technology donors also increases [7, 8].

Not only the Korean government but also government of many countries have been continuously increasing their government R&D budgets. The Ministry of Industry and Energy in Korea is formulating and promoting various policies for technology transfer and commercialization. The technology transfer rate from public research institute to company in the United States is 42.4% in 2020. However, Korea's technology transfer rate is only 37.9%. In particular, the technology transfer rate from universities to companies is lower than that from government-funded research institutes in Korea. The commercialization and business expansion of technology produced through university R&D activities should be transferred to companies for visible results. However, in Korea, technology transfer through university R&D is hindered by barriers and is not being activated. The main reason for the hindered technology transfer activation is the existence of technology transfer barriers [9, 10]. Various studies had been conducted to identify the barriers that lead to technology transfer failures, in order to promote the facilitation of technology transfer. Although the fundamental approach for resolving barriers to technology transfer have been studied, previous research has been conducted from a narrow definition of technology transfer. Technology transfer was defined based on specific academic fields and research purposes [1]. Early research defined technology transfers between organizations [9]. Previous research focusing on technology has defined technology transfers as efficient technology transfer policies from a technology donor to a technology user. However, the definition of existing technology transfer barriers needs to be redefined due to the expansion of the definition of technology transfer, because successful technology transfer is not simply about transferring technology, but also depends on a range of factors, such as the technology user's ability to absorb the technology and the suitability of the technology for the technology user's needs. Therefore, evaluating technology transfer donors, considering these factors, is essential. In other words, successful technology transfers are possible if the technology donor diagnoses the technology donor based on its diagnostic framework for the activation of

technology transfer and supports the technology donor in deriving the key indicators required for a successful technology transfer [10].

Most research related to technology transfer do not diagnose or evaluate technology donors but instead focuses on developing common key factors or cases to achieve success in technology transfers. Although diagnosing technology donors based on the framework of technology transfer activation is the key to a successful technology transfer [11], research on diagnosing technology transfer, analyzing technology donors, and deriving strategies is scarce. The most significant barrier to technology transfers is the absence of a technology transfer strategy caused by a lack of knowledge among technology transfer donors. The primary obstacles are the technology transfer activation strategy that the technology donor must select for a successful technology transfer and the technology donor's choice of technology transfer type. The selection of an efficient technology donor policy is a crucial success factor in technology transfers [12]. However, previous research has focused on analyzing the success factors of technology transfer, presenting technology transfer processes, or conducting case studies. Research focusing on technology transfer evaluation has also focused on proposing technology valuation models, analyzing the efficiency and effectiveness of technology transfer, or validating technology transfer paths.

Therefore, it is necessary to develop a technology donor diagnosis framework based on CSFs (Critical Success Factors) to eliminate obstacles to technology transfers. To lower the barriers to technology transfers, it is necessary to develop a strategy for a successful technology transfer based on the diagnosis of technology donors. The objectives of this study are as follows.

- The first objective is to develop a technology donor diagnosis framework to reduce barriers of technology transfer. The framework aims to diagnose universities, the technology donors, from various perspectives, and derive CSFs that are linked to the strategies. CSFs are derived using the process of building a BSC (Balanced Scorecard).
- The second objective is to develop a framework for deriving the normalized score of CSF. The PMs (Performance Measures) that make up CSF have different relative importance and measurement units. To diagnose the technology donors and derive strategies based on the diagnosis, it is essential to calculate the aggregation Score for each CSF. Therefore, in this study, we aim to derive the relative importance of PMs based on AHP (Analytic Hierarchical Process) and normalize the scores of each PMs based on the normal distribution.
- This study aims to derive strategies based on diagnosis, rather than just evaluation. To do this, the technology donors are classified according to their growth stages, and the scores of the technology donors are compared to those of others in the same growth stage to identify the CSFs that are lacking. By comparing technology donors in the same growth stage, optimized strategies for improving technology transfer will be derived.

This study develops a diagnosis framework for universities from the perspective of technology donors, implements and tests the framework using case studies, and proposes strategies for each stage of technology transfer growth. The research was conducted according to the following structure to achieve the research purpose. Section 2 presents a literature review on how technology transfers were evaluated from previous research and technology transfer perspectives. This helps determine the subsequent research methodology and achieve a basic understanding. Section 3 provides detailed research on the methods used and explains the diagnostic framework used step by step in this study. Section 4 examines the technology donor's diagnostic framework presented in the previous chapter using a case study and summarizes the results. Section 5 compares the present study with existing research and highlights the specifics and strengths of the current investigation. Finally, Section 6 summarizes the

research conclusions, provides further suggestions, details the technology donor's diagnosis, and evaluates the research limitations.

## Section 2: Literature review

Section 2 analyzes the literature on technology transfers. The section is divided into three sub-topics. The first lays the theoretical foundations for research by collecting and consolidating previous research on technology transfer activation. The second summarizes previous research on technology transfer evaluation. The third summarizes prior research on university technology transfers.

### Research related to technology transfer activation

The research related to technology transfer activation can be classified into activation strategy research and technology transfer models. Research that focuses on activation strategies can be classified into research that analyzes the establishment of institutions or policy derivation for the activation of technology transfers and research that derives and verifies success and failure factors. Moreover, the technology transfer model can be classified into presenting the technology transfer process through theoretical analysis and demonstrating the proposed model through case research. The [Table 1](#) presents a classification of the related literature based on the criteria presented in this study.

There have been studies not only on the aforementioned research, but also on criteria for selecting potential technology transfer partners [[35–37](#), [41](#)]. Criteria for selecting potential technology partners include compatibility, intellectual property, market potential, financial resources, reputation, and more.

There have also been studies on determining potential markets related to technology transfer [[40–42](#), [47–50](#)]. In almost all studies, after identifying the target market related to the technology to be transferred, market research is conducted to identify the strengths and weaknesses of existing products or services, technologies, and potential entry barriers. Then, considering regulatory and legal factors [[39](#)], consultation with industry stakeholders can ultimately determine the potential market related to the technology [[36](#)]. Overall, evaluating potential markets for technology transfer opportunities involves careful analysis of several key factors to ensure a strong value proposition for viable markets and potential customers. The evaluating a technology transfer opportunity requires consideration of several criteria, including market potential [[40–42](#)], intellectual property protection [[47](#)], technical feasibility [[27](#)], financial feasibility [[17–19](#)], and commercialization strategy [[48–50](#)]. By carefully evaluating these factors, technology transfer opportunities can be effectively evaluated and commercialized.

### Research related to technology transfer evaluation

There are no general theories, models, structures, or explanatory theories on technology transfer [[62](#)]. Moreover, there is currently no system for evaluating the success of technology

**Table 1. Research related to technology transfer activation.**

| Classification criteria   | Detailed criteria                                  | Related literature                                                                          |
|---------------------------|----------------------------------------------------|---------------------------------------------------------------------------------------------|
| Activation strategies     | Institutions and policies                          | [ <a href="#">13–26</a> ]                                                                   |
|                           | Success and failure factors of technology transfer | [ <a href="#">5</a> , <a href="#">17–20</a> , <a href="#">27–34</a> ]                       |
| Technology transfer model | Technology transfer process                        | [ <a href="#">9</a> , <a href="#">35–39</a> , <a href="#">41</a> ]                          |
|                           | Case research                                      | [ <a href="#">23</a> , <a href="#">40</a> , <a href="#">42–45</a> , <a href="#">47–52</a> ] |

<https://doi.org/10.1371/journal.pone.0293951.t001>

transfers before a product is designed, manufactured, marketed, or used. From the perspective of an organization, technology tends to be evaluated only in terms of usability and functionality. However, transferring technology from one stakeholder to another requires the assessment of a broader context [53]. Until now, when evaluating technology transfer, most studies have focused on evaluating organizations that receive technology [9, 24–26, 30–32]. Therefore, the receiving organization has been studied continuously, and evaluating the receiving organization's technical readiness has included evaluating the organization's technical infrastructure, capabilities, and expertise to effectively receive and utilize transferred technology [31, 32]. This included the organization's existing skills and R&D capabilities [17–19], and experience in implementing and managing similar technologies [23, 28]. In a similar sense, technology compatibility is becoming an important issue. The assessing the compatibility of the recipient organization's business model and culture with the technology being transferred is a critical step in the technology transfer process. By evaluating the recipient organization's business model, organizational culture, and technology infrastructure, a thorough assessment of compatibility can be made, which can help ensure the success of the technology transfer [28]. In addition, successful technology transfer was attempted by evaluating the organization's workforce and identifying gaps in technical skills or expertise [29]. Furthermore managing potential conflicts of interest is important to ensure that technology transfers are carried out ethically and responsibly as a whole. Processes such as third-party assessment, ethical guidance, conflict of interest management planning, supervision and review can help manage potential conflicts of interest and ensure ethical and responsible technology transfer [34].

Lastly, to assess the risks associated with a technology transfer, a risk management plan should be developed that includes identifying potential risks, analyzing their impact, and developing mitigation strategies. Measures to mitigate risk may include conducting due diligence, implementing contracts and agreements, establishing quality control measures, developing contingency plans, and providing training and support to recipients. The effectiveness of risk mitigation strategies should be regularly monitored and reviewed to ensure that risks are effectively managed throughout the technology transfer process [37–39].

Technology transfers can be classified into technology and knowledge according to the scope of the evaluation target. Research that evaluates technology can be classified into research that evaluates technology value according to research methods, research that assesses the effectiveness and efficiency of technology transfer, or research that analyzes the pathways of technology transfer. Research evaluating technology has focused only on technology valuation, and there has been little research that diagnoses technology donors or suggests strategies. However, it is necessary to comprehensively assess technology-related knowledge and expertise regarding technology transfers. Furthermore, most studies have only developed technological evaluation and diagnostic methodologies. The research related to the assessment of technology transfer is detailed in Table 2 below.

Most research has used different technology valuation models, with each model having its own scope, level of implementation, and methodology. For example, refer to the redevelopment of models based on previous research [16, 18, 32, 47, 62, 63], financial and statistical forecasting based on mathematical calculations [17, 20, 25], and the creation of a complex model

**Table 2. Technology transfer evaluation research.**

| Evaluation target | Evaluation method                     | Related Literature                         |
|-------------------|---------------------------------------|--------------------------------------------|
| Technology        | Technology Valuation Model            | [16–18, 20, 25, 32, 46, 47, 54–60, 62, 63] |
|                   | Effectiveness and Efficiency Analysis | [4, 19, 21, 61, 64, 66, 67]                |
|                   | Path Analysis                         | [24, 33, 49, 50, 65, 68–71]                |

<https://doi.org/10.1371/journal.pone.0293951.t002>

using a combination of different methods [32, 47, 62]. In terms of efficiency, research was mainly conducted to estimate the efficiency of technology transfers in a particular sector [19, 21, 67]. And to use the above method, existing studies have established indicators to measure success before technology. These indicators include intellectual property creation, revenue generation, cost savings achieved, developed products or services, patent applications or permits, job creation, and entry into new markets [16, 17]. Regular evaluation of these metrics can help determine the success of technology transfer and identify areas to improve in future technology transfer initiatives. Therefore, this study will also explore the indicators used in the previous study to establish the most influential indicators.

### Research related to technology transfer evaluation at the university

Modern entrepreneurial universities play a role in changing today's competitive society [73]. Higher education research suggests that universities are "the birthplace of a wide range of disciplines, with a detailed understanding of the types of problems faced by marginalized communities and the opportunities to address them" [74]. Universities play an important role in the technology transfer process. Universities are primarily responsible for innovative research and development and can convert them into commercially available products and services [73]. Through partnerships and collaborations with industry, universities reduce the gap between research and commercialization and help innovative technologies reach the marketplace and generate social benefits [73–75]. As part of this perspective, there is a trend in university technology transfer research that identifies the ways universities can contribute to socioeconomic development through innovation [75–82]. Technology transfers are a form of commercializing university research through the influence of knowledge, public participation and innovation [83].

Recently, universities have added new dimensions to their core research and training goals, with the additional purpose of commercializing their research-based technology. This dimension is subject to a broad field of research called technology transfers. It is a process by which universities use their dynamic capabilities to recognize and respond to changing opportunities and challenges [20]. Universities have emphasized the entrepreneurial nature of technology transfers, established start-up businesses engaging many professors and students, and developed fully fledged business ecosystems such as incubators [26]. In the official form of University Technology Transfers, universities protect the research results in the condition of intellectual property, which is then "sold" to factories or end-users. Profits from this activity are believed to have been reinvested into universities to fund further research [16].

The Table 3 below presents a literature review of research related to technology transfers at universities, which is the subject of this study. Research related to technology transfers at universities can be divided into research on technology transfers between universities and companies, technology transfers between universities and colleges, and venture startups within universities [72]. Technology transfers between universities and companies is the most frequent type, whereas the commercialization rate of technology transfers is the lowest [84].

**Table 3. University-enterprise technology transfer-related research.**

| Evaluation perspective | Related literature                    |
|------------------------|---------------------------------------|
| Cognitive aspects      | [16, 85–94]                           |
| Geographical aspects   | [52, 85–91, 93–101]                   |
| Organizational aspects | [23, 33, 85–91, 93–97, 102]           |
| Social aspects         | [20, 24, 85–91; 93, 94, 97, 100, 102] |

<https://doi.org/10.1371/journal.pone.0293951.t003>

University technology transfer-related research does not evaluate university technology transfers from a comprehensive perspective but instead analyzes technology transfer performance from a specific point of view. More research is needed to identify university technology transfers from a broader perspective and derive strategies based on it.

Many types of research are related to university technology transfers. The latest research trends include university research examining the efficiency of technology transfers to companies, research on the implementation of activities between countries and universities, and research investigating the transfer of nonprofit technology for the benefit of society. Furthermore, the implementation and role of the technology transfer department within the university [23, 24], staff skills issues [26, 33], and research based on university technology transfer implementation organizations have been conducted. Moreover, historical research on the growth and development of university technology transfer [52], its impact on academic entrepreneurship [16, 20], and the internal and external impacts of economic change on university technology transfer [20] has been conducted.

University-specific factors have been examined in the transfer of technological, human, and financial resources for research and technology licensing [105–108], and their effects on technology experience transfer [31, 109, 110]. Studies investigating administrative structures to support research and commercial activities (technology transfer offices, research departments, incubators) [111, 112], forms of ownership (private, public, or mixed) [27, 113], and formal and informal university institutions related to technology transfers [114] have shown effects on university technology transfer results. Research on university technology transfers suggests that there is a conflict between the scientific norm of entrepreneurship in the research sector, the rapid dissemination of research results, and the commercialization of research, which may represent a significant obstacle to university technology transfers [115–117]. Most research universities have a business ecosystem with property-based organizations, such as technology transfers and accelerators, which can stimulate entrepreneurship, and science/technology/research parks [118–120].

### Section 3: Research framework

The research methodology is illustrated in the following Fig 1. The technology donor diagnosis framework comprises two main phases.

The first phase comprises the PMs (Performance Measures) extraction method and a cause-and-effect diagram to reveal the causal relationship between CSFs (Critical Success Factors). Most previous research related to technology transfers between technology donors or universities measured single aspects of technology transfers, such as organizational or engineering aspects. To evaluate the technology donor to be linked to the process rather than a simple measurement, the PM should be drawn from the technology transfer strategy and the CSF should be connected [121]. Therefore, the cause-and-effect relationship is used to derive perspectives, strategies, and CSF.

As the PMs derived from Phase 1 have different measurement units, a normalization method should be used. Because the weights of each PM are also different and the PM has a causal relationship, an Analytic Network Process (ANP) should be used. It is possible to calculate the normalized score by point of view through the normalization and aggregation methods. Thus, it is possible to establish a strategy for each university (technology donor).

#### Phase 1: Development of critical indicators for technology donor diagnosis

**Redefining the process of technology transfers.** Technology transfers have been described in various ways in research and academic studies [122]. In initial research,

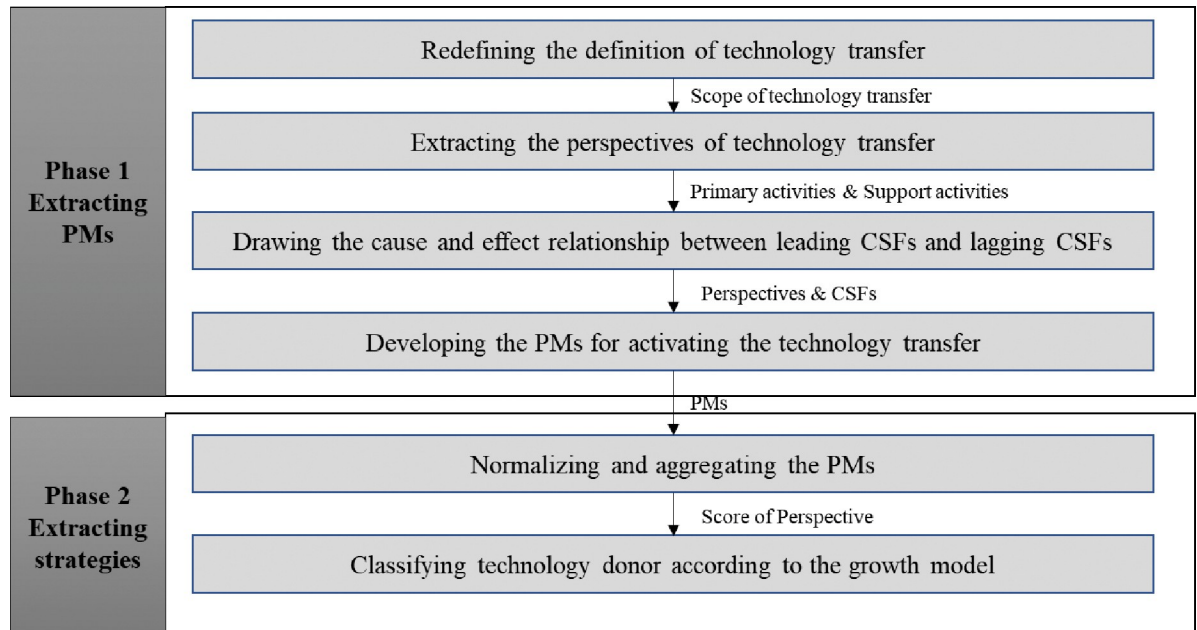

**Fig 1. Technology donor diagnosis framework.**

<https://doi.org/10.1371/journal.pone.0293951.g001>

technology transfer flow was defined as the flow of technology from a technician donor to a technology recipient. Intellectual property rights or inventions move from academic research to industry through licenses (use right) [122]. The process of technology transfers involves transferring a design to any organization for commercialization under a license contract between other organizations (or individuals) [123]. It also involves the transfer of technical knowledge and research results from universities to potential users. The definitions used in most studies have focused on a one-way process to deliver technology from technology donors to technology recipients. However, the commercialization of university-owned intellectual property, known as university technology transfers, is a complex process in which universities attempt to identify, patent, and license professors' inventions. These activities significantly impact the economy, resulting in a wide range of studies focusing on the interpretation, explanation, and improvement of technology transfer processes [124–127]. Therefore, this study redefines technology transfer by comparing and summarizing the theories of 35 research papers related to technology transfers published between 2015 and 2022.

**Extracting the perspectives of technology transfers.** The Korean government's R&D budget has continuously increased over the last several years. The Korean government and major science and technology countries are constantly expanding their R&D budgets. The Ministry of Trade, Industry, and Energy has established and promoted various technology transfer and commercialization policies. However, the technology transfer rates of the significant countries in science and technology are 35.9% in the United States and 46.7% in Europe, whereas in South Korea, they are only 24.2% [103].

Despite the increasing outcomes of university technology commercialization, evidence shows that TTOs (Technology Transfer Organizations) need to enhance their efficiency. For instance, although licensing revenue rose from 48,320 million Korean won in 2011 (50,887 million at the 2015 constant price) to 68,489 million Korean won in 2015, TTOs and universities paid 57,119 million won in registration and maintenance fees in 2015. Furthermore, the licensing revenue of universities still indicates a low leverage of government R&D spending in



South Korea at only 1.41% in 2018. The average contribution of licensing revenue to the overall university revenue was approximately 0.9% in 2016. Considering this situation, researchers, the government, and university administrators in South Korea have begun questioning the role of TTOs in developing innovation and knowledge-based economies [129, 130].

The results are only tangible when the technology produced through the R&D activities of the university is commercialized through transfer to the company. However, in Korea, technology developed through university R&D is blocked by technology transfer barriers, which prevent the activation of technology transfer [104]. There are several barriers for the inhibition of the activation of technology transfer. However, due to the expansion of the meaning of technology transfer, the existing definition of barriers to technology transfer must be redefined. Technology transfer barriers were redefined based on the literature review. The first barrier to technology transfer is the absence of technology transfer strategies of technology donors [104, 128, 131]. Even after market research on necessary technologies or technology applications, technology transfers fail because the technology donor fails to properly select the type and method of technology transfer. Further, technology users need knowledge not only about technology but also about technology application processes, technology innovation processes, and technology utilization-related knowledge (know-how, best practice). This is because technology transfers cannot be achieved directly by transferring technology licenses or intellectual property rights. The second barrier is a lack of information regarding the members of the technology donor [2, 128, 131]. To act, it is necessary to transfer knowledge rather than directly transfer technology to activate technology transfer cases, and implicit learning is more important than explicit knowledge [5] for the transfer of tacit knowledge, it is necessary to identify the members of the technology donor for the transferred technology. However, technology transfers fail because of the recruitment and forced participation of inappropriate personnel for technology transfer. The third barrier is the institutions related to technology transfers [2, 3, 104, 131, 132]. Most of the research related to barriers to technology transfers verifies that the main factors hindering technology transfers are the system and the regulations for non-financial and technology transfers. The final barrier is the cultural and environmental differences between providers and technology users [2, 3, 104, 131–133].

**Derivation of CSF for technology donor diagnosis.** In attempts to determine the pillars of technology transfers, researchers have identified many important factors that determine commercial success, such as designer involvement [138–140], proper coordination of governance mechanisms [141, 142], and the strength of the university's technology transfer office [66, 143, 144]. However, previous studies have lacked a comprehensive survey of technology transfer factors. Therefore, this step aims to be more realistic and accurate by identifying CSFs and mapping interrelationships based on cause-and-effect relationships. This step determines CSFs using the balanced scorecard method while considering the four perspectives derived from the previous stage. The identified factors were categorized as leading and lagging CSFs, and the corresponding relationships were drawn. A causal relationship will be derived between CSFs using the cause-and-effect diagram used in the BSC (Balanced ScoreCard) and CSFs unrelated to the technology transfer value will be excluded.

Rockart [134] defined CSF as "a limited number of components that ensure the organization's ability to compete successfully if the results are satisfactory." They developed the "CSFs method", which is intended to help executives understand what factors are essential and can create a potential competitive advantage [134, 145, 146]. Boynton and Zmud [135] defined the CSF as "going well to ensure the success of the organization" [147]. Technology transfers as a dependent variable depends on various factors [148, 149]. For a successful technology transfer process, it is important to identify these factors and the risks posed by their adverse effects must be mitigated using appropriate mechanisms. However, the transfer process will fail if

these factors are not considered sufficiently and organizations will suffer substantial financial and non-financial damage [150, 151].

The literature introduces these factors as CSFs in technology transfers [152]. Parmenter [153] identified CSFs as "a list of issues or aspects of an organization's operations that can be used to assess an organization's health and well-being" [153]. It is essential to identify critical factors for successful technology transfers [150, 154]. However, the identified success factors are not equally important. Therefore, deciding which factor is more critical and requires more attention and concentration always poses a question for organizations [151, 155]. A multifaceted decision-making approach considers the importance and impact of different dimensions, and prioritizes each critical success factor for decision makers. The successful implementation of technology transfer is vital for technologists and managers, and it is necessary to identify and manage essential CSFs. Therefore, CSFs are essential for success [156].

The BSC has been hailed as a widely used, high-impact management tool [157], and it has been widely studied in a wide range of research and industries [158]. It was developed to address the changing competitive environment in which intangible assets and nonfinancial indicators are becoming increasingly crucial in investor decision-making [159–165]. The BSC method enables providers to translate their technology transfer into a set of CSFs and assess the technology transfer through a comprehensive set of measures, referred to as PM. The relationship between the perspectives identified through the above methodology and CSFs was drawn using the cause-and-effect diagram and confirmed by case studies. The importance of cause and effect relationship in BSC lies in its ability to provide a clear understanding of the impact that various business activities have on each other and on the overall performance of the technology donor. By establishing a cause and effect relationship between CSFs of the balanced scorecard, technology donors can identify which areas of their operations are contributing to success and which areas require improvement. This information can then be used to make informed decisions, set goals, and allocate resources in a way that maximizes the technology donor's performance and achieves its strategic objectives. In short, cause and effect relationships help businesses to create a more cohesive and effective strategy by providing a clear understanding of how different components of the BSC relate to one another. Using a cause and effect diagram, technology donors can not only verify the relationships between CSFs but also derive CSFs for achieving the ultimate vision [160, 161]. The relationship between the perspectives identified through the above methodology and CSFs was drawn using a cause-and-effect diagram, a tool that offers several advantages in this context. The simplicity and visual clarity of the cause-and-effect diagram allow for an easy understanding of complex processes, simplifying the identification and presentation of potential causes related to our identified CSFs [159]. Moreover, this type of diagram encourages comprehensive thinking when analyzing problems, aiding in uncovering underlying issues that may not be immediately apparent [163]. Perhaps most importantly, it aids in identifying the root causes behind an effect or problem rather than merely addressing symptoms [162]. This effective visualization tool can lead to more insightful solutions and strategies related to our CSFs. After employing these benefits of cause-and-effect diagrams to establish relationships between various perspectives and CSFs, we further confirmed these relationships through case studies.

**Development of PMs for diagnosing technology donors.** Most previous research on technology transfer performance focused on the internal factors of an organization. According to Carlsson and Fridh [166], the transparency of inventions, research costs, and age of the TTO positively affect university patents and licenses. Some studies have found that researcher quality, R&D funding levels, TTO size, age, and the early start of technology transfer programs have a positive effect on technology transfer performance [140, 167–169]. Other researchers have used incentive mechanisms as a theoretical basis. Friedman and Silberman [27] believe

that rewarding researchers, such as university location, specific mission to transfer technology, and previous experience in technology transfer positively affect technology transfer performance. Other studies have shown similar effects of the royalty rate or teacher bonus system on university license revenues [30, 142, 170–173]. Adams et al. [174] concluded that R&D collaboration agreements between public research institutes and companies promote R&D and patenting, which are beneficial for production and associated with improved technology transfer performance. Park et al. [175] examined the membership of a research consortium of public research institutes and firms and found that they increased technology transfer performance.

Previous research on technology transfer performance has focused on the role of the government as a source of research funding, ignoring the information channel [168, 169, 176]. To support technology transfers between universities and industries, the government seeks to address research inequalities and funding for R&D cooperation in the manufacturing sector [75]. Information inequality leads to both high transaction costs and inefficiencies [66, 177].

At a university, performance measurement is a structured process in which the technology transfer office identifies, measures, and monitors essential programs, systems, and procedures [178]. The technology transfer strategy revolves around the commercial functions of the technology transfer office and is related to the university's overall strategy. After a goal is set, the actual definition of performance metrics and measurements can be initiated [179]. Developing performance metrics for various sub streams and stakeholders is becoming increasingly difficult, with complexity growing as the scope of performance becomes more diverse [180–185].

There are limitations to assessing the technology transfer of technology donors using the PMs used in specific studies. Therefore, key performance indicators for measuring CSF were derived based on a literature review. Two to three PMs were extracted to measure the CSF based on a cause-and-effect relationship analysis.

## Phase 2: Development of strategies for each growth stage of technology donors

**Normalizing and aggregating the PMs.** PMs were expressed in different quantities. Therefore, it was necessary to use normalization and aggregation methods. Based on the following formula, the PMs can be normalized:

$$p_{ij}^n = \int \frac{1}{\sigma_{ij}\sqrt{2\pi}} \text{Exp} \left[ -\frac{(p_{ij} - \mu_{ij})^2}{2\sigma_{ij}^2} \right] \quad (1)$$

$p_{ij}^n$ : Normalized value of j th PM of i th perspective

$p_{ij}$ : Value of j th PM of i th perspective

$\sigma_{ij}$ : Standard deviation of j th PM of i th perspective

$\mu_{ij}$ : Mean of j th PM of i th perspective

The normalized value of the ith perspective is expressed as follows and aggregated using the following equation:

$$p_i^n = \sum p_{ij}^n \times W_{ij} \quad (2)$$

$p_i^n$ : Normalized value of i th perspective

$W_{ij}$ : Relative importance weight of i th perspective

The relative importance weight was derived using the Analytical Hierarchy Process (AHP). The existing technology transfer evaluation-related studies have been conducted from a specific perspective. Because the scope for evaluating technology transfers is vast, there is a limit to the extent to which the focus of research can be scattered when considering all factors.

Therefore, it is needed to extract and test the elements that influence the success of technology transfers. In this study, the CSF that directly affects the success of technology transfer was derived from the cause-and-effect diagram of the BSC. Subjective influence was identified by deriving the relative importance of CSF through the AHP. Moreover, an aggregation method was developed and a method for quantitative evaluation is presented. Multi-criteria decision-making (MCDM) is a popular decision-making method. It is a branch of operational research that addresses the multi-criteria decision-making process [186]. AHP has been found to be the most suitable method for solving complex decision-making problems [187–189] and is helpful for hierarchical decision-making. Therefore, it has been used in various project management decisions, including contractor selection [57], project selection [136], supplier selection [191], performance evaluation [192], stakeholder evaluation [193], quality improvement [194], and risk ranking [195–197].

**Classifying technology donors according to technology growth model.** The growth stages of technology donors are classified as follows:

- Infant stage: Technology donors who scored low in all perspectives
- Growth stage: Technology donors who scored high only in institutional or organizational perspectives
- Expansion stage: Technology donors with high scores in terms of institution and organizations, and high scores in terms of human or knowledge perspectives
- Maturity stage: Technology donors who scored high in all perspectives except for value perspective

Based on the technology donor's diagnostic system, a strategy was proposed for each growth stage. The strategy of technology transfers, according to a technology donor's growth stage, substantially affects the success of technology transfer. It is possible to develop a strategy based on accurate evaluation and diagnosis of technology donors. Moreover, the growth stages of technology donors were classified into the Infant, Growth, Expansion, and Maturity stages. The stage to which the technology donor belongs and the key success factors lacking among the CSFs of technology transfer are expected to lay the foundation for successful technology transfers. Therefore, we intend to develop a technology-donor diagnostic framework that includes this series of processes.

## Section 4: Case study

### Phase 1: Development of critical indicators for technology donor diagnosis

**Redefining the process of technology transfers.** This research redefines the technology transfer process by comparing and summarizing the theories of 35 research papers related to technology transfers published between 2015 and 2022.

As shown in Table 4, extensive research has been conducted on technology transfers in recent years, and they have come up with a wide range of definitions related to technology transfers. By comparing and summarizing these definitions, we redefine the definition of technology transfer in this study: "Technology transfer is the two-way technology transfer process containing information about techniques, know-how, best practices, and technology knowledge."

**Extracting the perspectives of technology transfers.** Based on the technology transfer barriers mentioned in previous studies, the perspectives on the technology transfer process can be divided into four main categories. Human factors include professionals, participants, intermediaries, and engagement in technology transfers, which are categorized into a single

**Table 4. Definition of technology transfer by related research.**

| Definition of TT                                                                                                                                  | Author                  |
|---------------------------------------------------------------------------------------------------------------------------------------------------|-------------------------|
| The one-way process of adopting foreign technology                                                                                                | [19, 199]               |
| All the activities underpin the transition of a group of factors (such as knowledge, technology, and methods) from scientific research to markets | [200–202]               |
| An active process in which advanced technologies are transferred between two different factors                                                    | [49]                    |
| Profitable operation of inter-branch technology transfer                                                                                          | [25, 41, 48, 53]        |
| The development process to create innovation                                                                                                      | [17, 18, 203]           |
| The process of creating and trading rights through a patent                                                                                       | [23, 204]               |
| The process of creating and trading rights through patents using the university's reputation                                                      | [24, 52]                |
| The process of entering the economy through technology transfer specialists                                                                       | [26, 51]                |
| The process of implementing technology through projects and programs                                                                              | [32, 50]                |
| The process of integrating university research into markets.                                                                                      | [16, 20, 127, 205, 206] |
| The process of introducing new equipment and know-how                                                                                             | [62]                    |
| The process of introducing technology through a business model                                                                                    | [47, 63]                |
| The process of trading technology through the university's technology transfer office                                                             | [22, 33, 34, 129, 207]  |
| The two-way process of delivering technology to an organization through a technology transfer office                                              | [21]                    |

<https://doi.org/10.1371/journal.pone.0293951.t004>

group. Knowledge factors are grouped according to knowledge, information, and species regarding the technology being transferred. Institutional factors that indicate involvement in the intermediary institutional or technology transfer process, are in another group. Finally, organizational factors, which refer to the receiver or transmitter of the technology, are in one group. This section illustrates these factors more clearly based on previous research.

As shown in Fig 2, technology transfer providers have four central derivations. First, human perspectives include personnel, human resources, specific capabilities, behavioral patterns, education degree, gender, and speed. Knowledge perspectives include technology, network, knowledge, sharing, inventions, IP, patentability, licensing, strategy, equipment, production techniques, and methods. Third, institutional perspectives include institutions, TTO, finance, incentives, reward systems, license agreements, entrepreneurial universities, university prestige, invention disclosures, reward systems, academic entrepreneurship, projects, patents, licenses, R&D centers, and technology scouts. Finally, organizational perspectives include language and procurement, corporate culture, organizations, subnational regions, stakeholders, and interbranches.

**Derivation of CSF for technology donor diagnosis.** These five perspectives with 20 CSFs were sorted from the literature review, and the cause-effect diagrams between the identified perspectives and CSFs were illustrated. In the cause-and-effect relationship diagram, the CSFs of technology transfer are categorized as leading and lagging factors, and the relationships are presented in ascending order. The cause-and-effect relationship between the leading and lagging CSFs is depicted in Fig 3.

Human and knowledge perspectives are directly related to the efficiency of technology transfer and are influenced by organizational and institutional perspectives. In the cause-and-effect relationship diagram, the CSFs of technology transfer are categorized as leading factors, and the lagging factors and relationships are illustrated in ascending order. For example, the CSFs in a human perspective, CSFs provide training, which is a form of continuous education that builds human resources for research and development. Expertise and experience in R&D are, in turn, used to create rewards and motivational systems. These cause-and-effect diagrams

|                            |                       |           |                  |                       |                      |                           |                      |
|----------------------------|-----------------------|-----------|------------------|-----------------------|----------------------|---------------------------|----------------------|
| [16]                       |                       |           | Technology       | Knowledge             |                      | Entrepreneur universities |                      |
| [23]                       |                       |           | Inventions, IP   | Patentability         |                      | TTO                       |                      |
| [24]                       |                       |           |                  | License               | TTO                  | University prestige,      | Organization         |
| [33]                       | Specific capabilities |           | Technology       | Knowledge             | Licensing agreements | Invention disclosures     |                      |
| [26]                       | Human resource,       | Degree    | Technology       | Knowledge             |                      | Reward system             |                      |
| [52]                       | Human resource        |           | Technology       | Knowledge             |                      | Academic entrepreneurship |                      |
| [20]                       | Human resource,       | Speed     | Technology       | Knowledge             |                      |                           | Sub-national regions |
| [34]                       |                       |           | Technology       | Strategy              |                      | TTO                       | Stakeholder          |
| [41]                       |                       |           |                  | Technology equipment  |                      | Institution               | Inter branch         |
| [51]                       | Behavioral patterns,  | Personnel | Technology       | Knowledge             |                      | Projects                  |                      |
| [50]                       |                       |           | Technology       | Production techniques |                      | Projects                  |                      |
| [25]                       |                       |           |                  | Technology            |                      | Institution               |                      |
| [68]                       |                       |           |                  | Technology            |                      | TTO                       | Organization         |
| [22]                       |                       |           | Technology       | Knowledge             | TTO                  | Patent                    |                      |
| [19]                       |                       |           |                  | Technology            |                      | Projects                  | Organization         |
| [47]                       | Personnel             |           |                  | Technology equipment  |                      |                           | Organization         |
| [32]                       |                       |           | Technology       | Knowledge             | TTO                  | Projects                  |                      |
| [49]                       |                       |           |                  | Technology            |                      | Patent                    | Organization         |
| [17, 18, 48, 53, 202, 204] |                       |           |                  | Technology            |                      |                           | Organization         |
| [62, 207]                  | Personnel             |           | Technology       | Knowledge             |                      |                           | Organization         |
| [63, 200]                  |                       |           | Technology       | Knowledge             |                      |                           | Organization         |
| [128]                      | Human resource        |           | Technology       | Knowledge             |                      | License                   |                      |
| [201]                      | Gender                |           | Knowledge        | Technology, methods   |                      |                           | Organization         |
| [206]                      |                       |           | Technology       | Knowledge             |                      | R&D center                | Organization         |
| [208]                      |                       |           |                  | Technology            | TTO                  | Technology scouts         | Organization         |
| [130]                      |                       |           | Technology       | Knowledge             |                      | TTO                       |                      |
| [205]                      |                       |           |                  |                       |                      | Patent                    | Organization         |
| [203]                      |                       |           | Technology       | Knowledge             |                      | Institution               |                      |
|                            | <b>Human</b>          |           | <b>Knowledge</b> |                       | <b>Institution</b>   |                           | <b>Organization</b>  |

Fig 2. Derivation of the technology donor diagnosis point of view.

<https://doi.org/10.1371/journal.pone.0293951.g002>

were meticulously crafted based on an extensive review of existing literature [66, 138–142, 208–239] and universal understanding and our perspectives. It able to derivate the technology donor diagnosis point.

**Development of PMs (PM) for diagnosing technology donors.** In this step, candidate PMs were developed to measure CSF and technology donors by designating indices that are highly relevant to CSF performance among the candidate PMs as core PMs. The Table 5 presents measurement of technology donors.

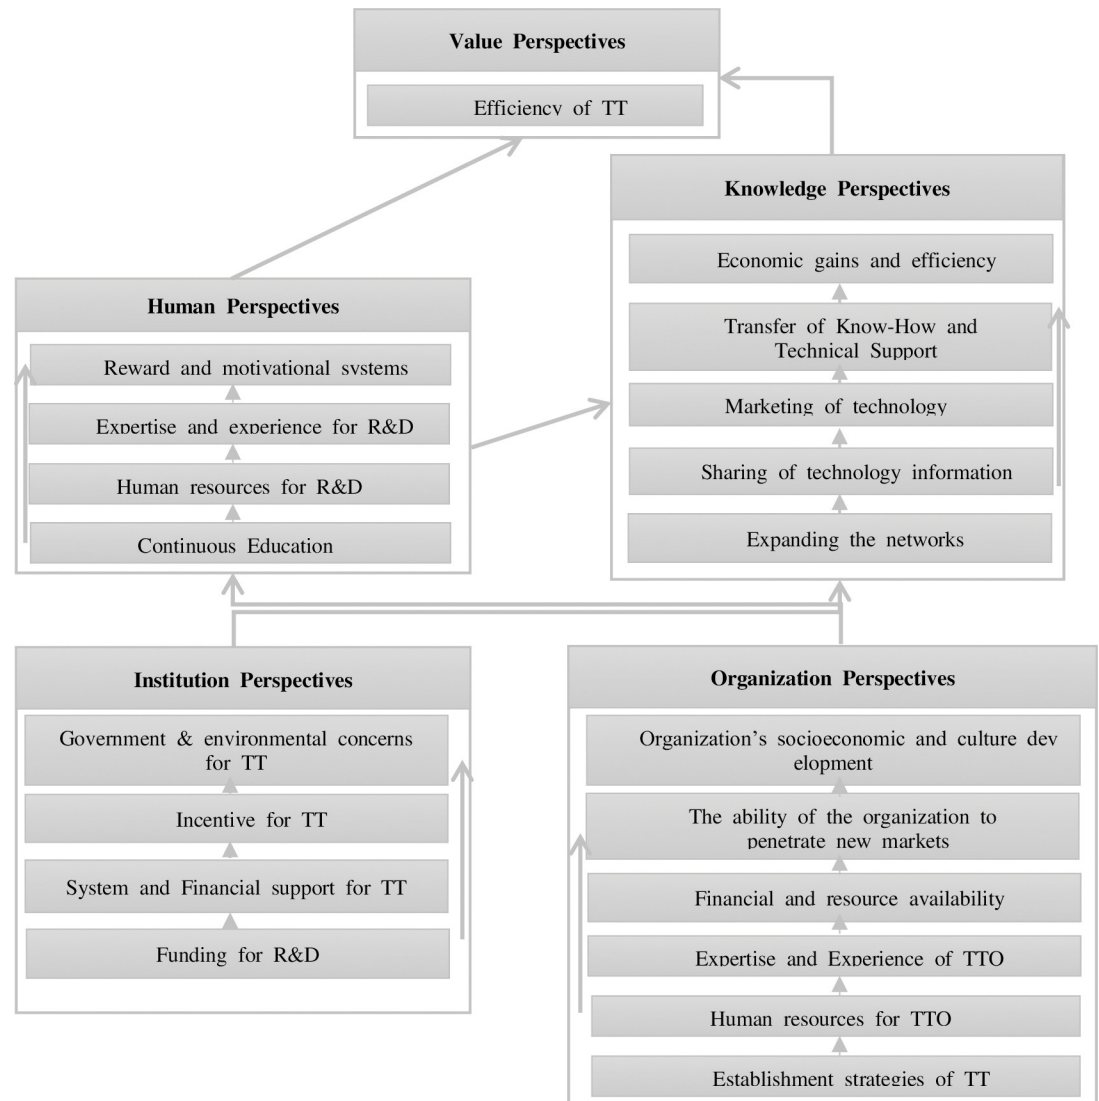

**Fig 3. Derivation of the technology donor diagnosis perspectives.**

<https://doi.org/10.1371/journal.pone.0293951.g003>

With previous research establishing a foundation, technology transfer strategies were studied, the CSFs influencing them were identified, and PMs were extracted based on CSFs.

## Phase 2: Development of strategies for each growth stage of technology donors

**Normalizing and aggregating the PMs.** All PMs were measured according to standardization and normalization formulas. The relative importance weights derived through the AHP and the statistics of the PMs are shown in the [Table 6](#) below.

**Classifying technology donors according to technology growth model.** The following [Table 7](#) were obtained by classifying 118 universities according to their growth stages.

To develop a strategic proposal for each stage of the growth of technology transfer providers based on the diagnostic diagram of technology transfers, the previous phase determined which technology transfer provider belonged to which growth stage of technology transfer. Based on

Table 5. Measurements of technology donors by designating indexes.

| Perspectives                                           | Strategies                                             | CSFs                                                                                                           | PMs                                                                                    |
|--------------------------------------------------------|--------------------------------------------------------|----------------------------------------------------------------------------------------------------------------|----------------------------------------------------------------------------------------|
| Organization                                           | Strategic approach and Goal for TT [208, 209]          | Organization’s socioeconomic and cultural development [63, 210, 211]                                           | Level of sharing the vision                                                            |
|                                                        |                                                        | The ability of the organization to penetrate new markets [203, 210, 212]                                       | Level of sharing the goal                                                              |
|                                                        |                                                        | Financial and resource availability [63, 155, 211, 212]                                                        |                                                                                        |
|                                                        |                                                        | Establishment strategies of TT [63, 154, 155, 203, 210, 212, 213]                                              | Level of sharing the strategy<br>Level of differentiation strategy                     |
|                                                        | The outstanding capability of TTP                      | Expertise and Experience of TTO [154, 210, 212, 214–220]                                                       | Experience periods of TTO                                                              |
|                                                        |                                                        | Human resources for TTO [63, 203, 210, 215, 216, 218, 220–222]                                                 | The number of members in TTO                                                           |
| Expertise and experience of TTO member [212, 217, 225] |                                                        | Average experience of managers                                                                                 |                                                                                        |
| Institution                                            | Institutional support for R&D [10, 223, 224, 226, 254] | Government and environmental concerns for TT [4, 147, 203, 210]                                                | Level of R&D guideline                                                                 |
|                                                        |                                                        | Funding for R&D [4, 147, 210, 215, 218, 220–222]                                                               | Presence of R&D funding                                                                |
|                                                        | Institutional support for TT [60, 213]                 | System and Financial support for TT [147, 154, 193, 203, 210, 212, 216, 217, 226, 227]                         | Management and activity cost for TT                                                    |
|                                                        |                                                        |                                                                                                                | Protection cost<br>Level of TTO support                                                |
|                                                        | The incentive of technology donors [215, 218, 228]     | Incentive for TT [4, 60, 147, 217, 228, 229–232]                                                               | Incentive for researcher<br>Incentive for manager                                      |
| Human                                                  | The expertise of the R&D researcher                    | Human resources for R&D [10, 154, 155, 210, 212, 215, 221, 224, 231]                                           | The number of researchers                                                              |
|                                                        |                                                        | Expertise and experience in R&D [145, 154, 210, 212, 225]                                                      | The number of PhD                                                                      |
|                                                        | Excellent capability of member [10, 213, 232]          | Continuous Education [10, 155, 208–210, 212, 227, 232]                                                         | The number of education to researcher<br>The number of educations to manager.          |
| Knowledge                                              | Sharing information [234, 235]                         | Economic gains and efficiency in the organization                                                              | Level of post-support                                                                  |
|                                                        |                                                        | Efficient management and Sharing of technology information in organizations [63, 203, 208, 210, 212, 220, 230] | Level of DB<br>External access of DB for search                                        |
|                                                        |                                                        | Marketing of technology in Organization [63, 209, 210, 213, 220, 236, 237]                                     | The number of exhibition participations and advertisements                             |
|                                                        | Sharing knowledge [238]                                | Transfer of Know-How and Technical Support [154, 155, 203, 210, 212, 220, 236]                                 | The cost of participations in technical presentations and advisory                     |
|                                                        | Expanding network [10, 214, 217, 239]                  | External Network [154, 203, 209, 212]                                                                          | The number of task agreement with external agencies<br>The number of external agencies |
|                                                        |                                                        | Internal Network [155, 203, 212]                                                                               | The number of regular relationships meeting between researcher and manager             |
| Value                                                  | The efficiency of TT                                   | The efficiency of TT [221]                                                                                     | Royalty/R&D budget                                                                     |
|                                                        |                                                        |                                                                                                                | Royalty/Researchers                                                                    |
|                                                        |                                                        |                                                                                                                | The number of TT/R&D budget                                                            |
|                                                        |                                                        |                                                                                                                | The number of TT/Researchers                                                           |

<https://doi.org/10.1371/journal.pone.0293951.t005>

this, the Fig 4 were obtained by measuring the technology transfer scores of all the technology donors from five perspectives.

In the case of universities in the infancy stage, most universities showed low scores in institutional perspectives on technology transfer. Therefore, new technology transfer universities should pursue strategies to accelerate technology transfers and move towards the next stage of growth by involving intermediaries, experts, and technology transfer offices. In the case of universities in their growth stage, most showed low scores from the knowledge perspective of technology transfers. Therefore, growing technology transfer universities should pursue strategies to develop technology transfers and move to the next growth stage by increasing their



**Table 6. Relative importance weight and statistics of PMs.**

| Perspectives        | PMs                                                                        | Relative importance weight | Min. | Max.   | Average | Standard Deviation |
|---------------------|----------------------------------------------------------------------------|----------------------------|------|--------|---------|--------------------|
| <b>Organization</b> | Level of sharing the vision                                                | 0.098976                   | 1.0  | 2.0    | 1.4     | 0.5                |
|                     | Level of sharing the goal                                                  | 0.059727                   | 1.0  | 2.0    | 1.4     | 0.5                |
|                     | Level of sharing the strategy                                              | 0.049488                   | 1.0  | 2.0    | 1.6     | 0.5                |
|                     | Level of differentiation strategy                                          | 0.041809                   | 1.0  | 2.0    | 1.5     | 0.5                |
|                     | Experience periods of TTO                                                  | 0.347938                   | 4.0  | 20.0   | 9.4     | 3.0                |
|                     | The number of members in TTO                                               | 0.162371                   | 0.0  | 30.0   | 3.2     | 5.7                |
|                     | Average experience of managers                                             | 0.239691                   | 0.0  | 28.0   | 4.6     | 6.4                |
| <b>Institution</b>  | Level of R&D guideline                                                     | 0.074209                   | 1.0  | 2.0    | 1.0     | 0.2                |
|                     | Presence of R&D funding                                                    | 0.222628                   | 1.0  | 2.0    | 1.2     | 0.4                |
|                     | Management and activity cost for TT                                        | 0.324088                   | 3.8  | 300.7  | 57.3    | 48.9               |
|                     | Protection cost                                                            | 0.108029                   | 11.2 | 6999.0 | 644.7   | 1116.2             |
|                     | Level of TTO support                                                       | 0.108029                   | 1.0  | 2.0    | 1.4     | 0.5                |
|                     | Incentive for researcher                                                   | 0.081509                   | 2.0  | 3.0    | 2.5     | 0.5                |
|                     | Incentive for manager                                                      | 0.081509                   | 3.0  | 6.0    | 4.5     | 1.1                |
| <b>Human</b>        | The number of researchers                                                  | 0.5625                     | 15.0 | 7566.0 | 780.6   | 1275.9             |
|                     | The number of PhD                                                          | 0.1875                     | 4.0  | 4436.0 | 382.7   | 629.5              |
|                     | The number of education to researcher                                      | 0.1875                     | 0.1  | 25.0   | 4.6     | 4.7                |
|                     | The number of educations to manager.                                       | 0.0625                     | 0.3  | 10.0   | 3.5     | 2.3                |
| <b>Knowledge</b>    | Level of post-support                                                      | 0.05861                    | 1.0  | 3.0    | 1.5     | 0.6                |
|                     | Level of DB                                                                | 0.05861                    | 1.0  | 2.0    | 1.4     | 0.5                |
|                     | External access of DB for search                                           | 0.160356                   | 1.0  | 2.0    | 1.5     | 0.5                |
|                     | The number of exhibition participations and advertisements                 | 0.262571                   | 0.0  | 24.0   | 3.1     | 4.2                |
|                     | The cost of participations in technical presentations and advisory         | 0.163017                   | 0.0  | 500.0  | 10.0    | 47.8               |
|                     | The number of task agreement with external agencies                        | 0.059367                   | 2.0  | 5.0    | 3.3     | 0.9                |
|                     | The number of external agencies                                            | 0.178102                   | 0.0  | 24.0   | 1.8     | 3.4                |
|                     | The number of regular relationships meeting between researcher and manager | 0.059367                   | 0.0  | 100.0  | 2.9     | 10.0               |
| <b>Value</b>        | Royalty/R&D budget                                                         | 0.123762                   | 0.0  | 0.1    | 0.0     | 0.0                |
|                     | Royalty/Researchers                                                        | 0.222772                   | 0.0  | 3.6    | 0.5     | 0.7                |
|                     | The number of TT/R&D budget                                                | 0.163366                   | 0.0  | 0.0    | 0.0     | 0.0                |
|                     | The number of TT/Researchers                                               | 0.490099                   | 0.0  | 1.1    | 0.1     | 0.1                |

<https://doi.org/10.1371/journal.pone.0293951.t006>

R&D, academic research, technology, and knowledge. In the case of universities in the expansion stage, most showed low scores in the value and organizational perspectives of technology transfers. Therefore, sustainable technology transfer universities should pursue a strategy to evaluate technology transfer efficiency and move to the next growth stage by calculating human and financial resources and developing organizational establishment and culture. In the case of universities in the maturity stage, most showed low scores in the value perspectives of technology transfer. Therefore, advanced technology transfer universities should pursue strategies to evaluate technology transfer efficiency and move to the next growth stage by evaluating technology transfer efficiency and conducting research to further develop technology transfers.

**Table 7. Classification of technology transfer donors into growth stages.**

| Infant stage | Growth stage | Expansion stage | Maturity stage |
|--------------|--------------|-----------------|----------------|
| 37           | 34           | 31              | 15             |

<https://doi.org/10.1371/journal.pone.0293951.t007>

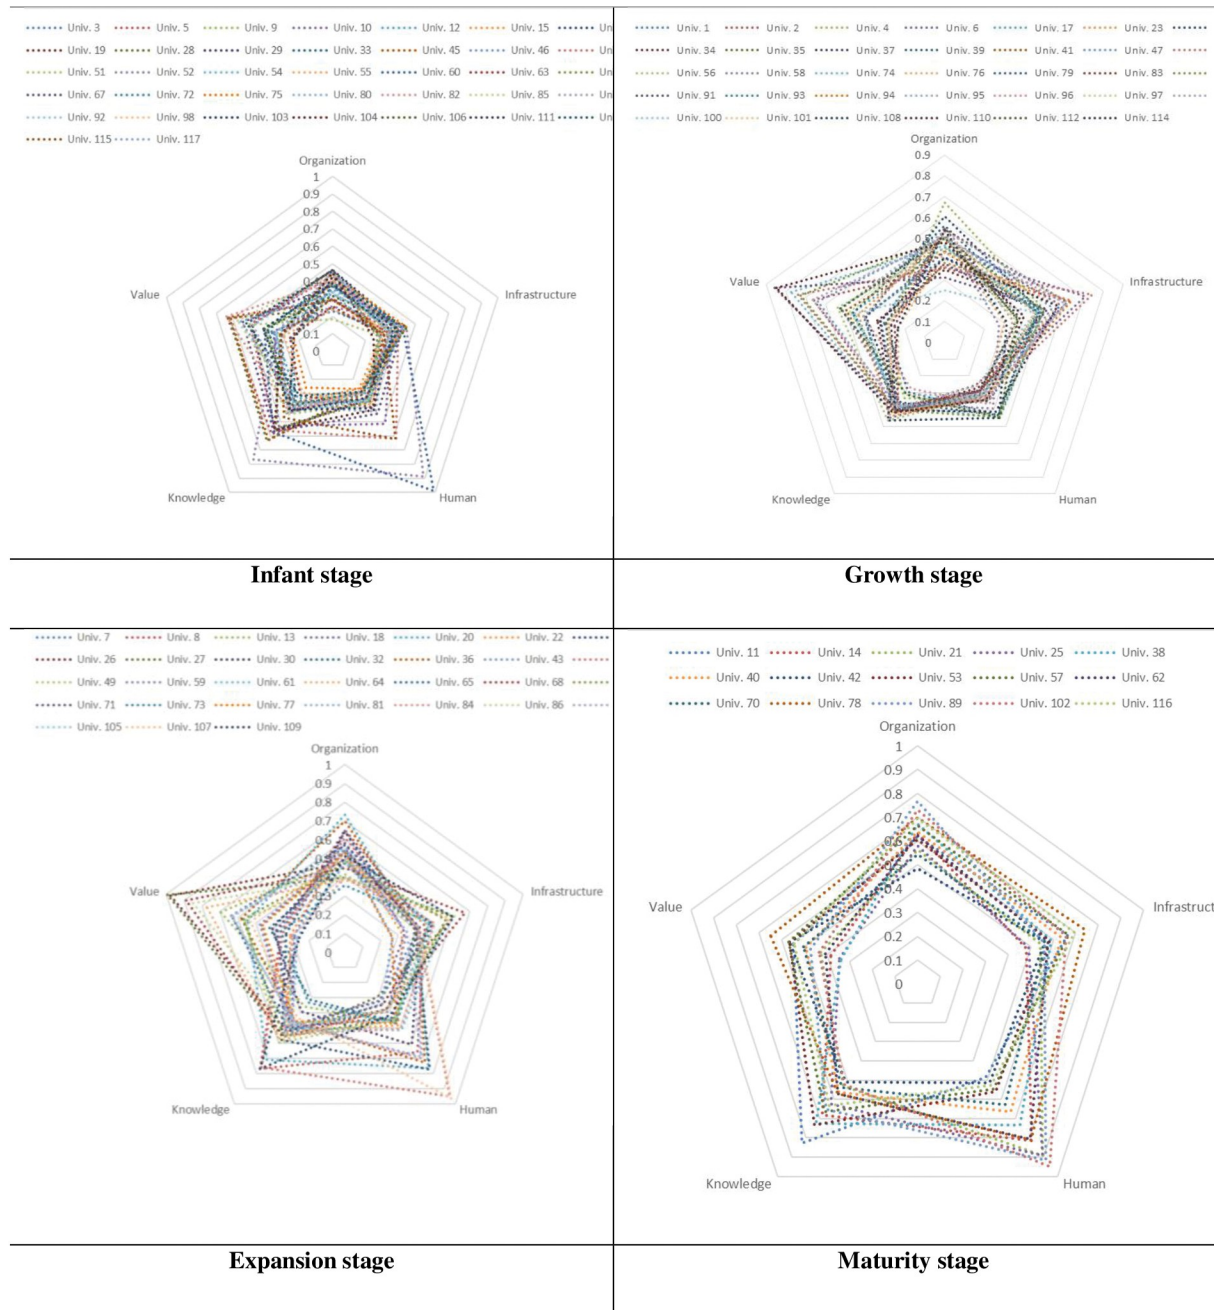

**Fig 4. Diagnosis results of technology transfer donors.**

<https://doi.org/10.1371/journal.pone.0293951.g004>

### Section 5: Discussions

To activate technology transfer, various studies are being conducted. Studies related to technology transfer activation can be classified into those that provide activation strategies and those that present technology transfer models. Studies that provide activation strategies can be further classified into those that analyze the establishment of institutions or policies for technology transfer activation, and those that derive and verify success and failure factors. Research examining the dependence between the characteristics of technology donors and the success

of technology transfer had been actively being conducted [169]. The research related with the technology donor's capabilities have been investigated in various studies [168, 251–253]. Additionally, technology transfer models can be classified into theoretical studies that present technology transfer processes, and case studies that validate the presented models. Research had been conducted to evaluate technology transfer at universities, but most research had only reflected a narrow aspect of university technology transfer. As a result, multidimensional evaluations of technology transfer have not been performed, and evaluations have been limited to narrow aspects such as cognitive, graphical, organizational, or social aspects. Furthermore, despite the need to derive optimal strategies for improving the efficiency of technology transfer based on evaluations, previous studies had failed to connect evaluation with strategy derivation.

The growth stage of a technology donor affects the type of technology transfer and the technology transfer strategy. Some researchers have classified the growth stages of technology donors from a technology transfer perspective and suggested appropriate technology transfer types according to the growth stages [216]. However, evaluation in prevision research had been only conducted from a limited organizational perspective. Therefore, this study presents a diagnostic framework for facilitating technology transfer from the perspective of universities, that is, technology donors, and suggests strategies for each growth stage of technology transfer providers to facilitate technology transfers.

The distinctiveness of this study lies in its multidimensional diagnosis and strategy formulation based on the diagnosis. It is able to assess multidimensional perspectives, because CSFs and PMs were extracted based on BSC. Furthermore, by comparing the perspectives score of technology donors in different universities, technology donors can identify the areas in which each university is lacking in its current situation. Multidimensional diagnosis and aggregation score of technology donors offer to extract optimal CSFs for technology transfer activation for each growth stage. Therefore, we compared this study with previous technology transfer evaluation studies based on the criteria of multidimensional diagnosis and strategy formulation. The comparison results are shown in the following Table 8. The following table presents a comparison of this research with previous studies based on the diagnosis target and strategy

**Table 8. Comparison of previous research.**

| Research     | Diagnosis target                   |                                      |                                       | Strategy presentation               |                                         |                                                 |
|--------------|------------------------------------|--------------------------------------|---------------------------------------|-------------------------------------|-----------------------------------------|-------------------------------------------------|
|              | Technical and intellectual aspects | Aspects of TTP within the University | Institutional aspects of Universities | Organizational Perspective Strategy | Technology transfer activation strategy | Classification of Growth stages of Universities |
| [240, 250]   | O                                  | X                                    | O                                     | O                                   | X                                       | X                                               |
| [219]        | O                                  | X                                    | O                                     | O                                   | X                                       | X                                               |
| [137, 169]   | O                                  | X                                    | O                                     | O                                   | X                                       | X                                               |
| [190, 198]   | X                                  | O                                    | X                                     | O                                   | X                                       | O                                               |
| [1, 249]     | X                                  | X                                    | X                                     | O                                   | O                                       | X                                               |
| [241, 242]   | O                                  | X                                    | X                                     | O                                   | O                                       | X                                               |
| [243]        | O                                  | X                                    | X                                     | X                                   | O                                       | X                                               |
| [244–248]    | O                                  | X                                    | X                                     | O                                   | X                                       | X                                               |
| [207]        | O                                  | O                                    | O                                     | O                                   | X                                       | X                                               |
| [129]        | O                                  | O                                    | O                                     | X                                   | X                                       | X                                               |
| [202, 206]   | X                                  | O                                    | O                                     | X                                   | X                                       | X                                               |
| [204]        | O                                  | O                                    | X                                     | O                                   | X                                       | X                                               |
| Our research | O                                  | O                                    | O                                     | O                                   | O                                       | O                                               |

<https://doi.org/10.1371/journal.pone.0293951.t008>

suggestions. Previous research has focused on technology transfer strategies without evaluating technology transfer activities. Despite the need to comprehensively assess the knowledge and expertise related to technology for successful technology transfers, most research has been developed using evaluation and diagnostic methods to target technology only.

## Section 6: Conclusions

### Contributions

The rapid development of technology had created limitations for all companies to develop technology and as a result, the demand for technology transfer was gradually increasing. In Korea, technology transfer is carried out from public research institutes to companies. While technology transfer from government-funded research institutes to companies was relatively active, technology transfer from universities to companies was not insufficient. Many studies had been conducted to remove barriers to technology transfer from universities to companies. However, for successful technology transfer, strategies for selecting technology donors based on the evaluation is necessary. In addition, in order to activate technology transfer from universities, it is necessary for universities to identify their weaknesses as technology donors and to develop strategies for maximizing resource utilization. Therefore, a diagnosis framework for activating technology transfer from the viewpoint of the technology donors rather than the technology users who received the technology was developed. Moreover, the framework was applied to Korean universities.

To provide an accurate diagnosis of technology donors, the study proposed two stages of framework: the first stage is to derive PMs based on the BSC and the second stage is to provide normalized score for each perspective based on normalization and aggregation method. To derive PMs, barriers to technology transfer were identified and strategies to reduce them were developed. CSFs were then derived based on the strategies and verified through a cause and effect relationship. Finally, PMs were derived to measure CSFs. A relative importance weight was extracted using the AHP to derive score for each perspective of technology donors. The normalization and aggregation methods were used to provide a score for each perspective. Finally, universities were classified by growth stage and through relative comparison between universities belonging to each growth stage, lacking perspectives was identified for each university. As technology donors, universities can increase the efficiency of technology transfer by selecting and implementing strategies and CSFs to raise the insufficient perspective score.

To verify the applicability of the research framework presented in this study, we applied the framework to universities in Korea that were playing the role of technology donors. As a result, universities in the maturity stage were found to have high scores in all perspectives. However, Univ.11 had a relatively lower score in the value perspective compared to other universities in the maturity stage. While Univ.11 had a high level of infrastructure, institutional organization, human resource support, and knowledge support, the efficiency and effectiveness of technology transfer were still insufficient. As technology transfer donor, Univ.11 needs publicity so that technology transfer can take place. The perspective scores of the 65 universities in the expansion and growth stage showed a significant difference. Among the 65 universities, there were many engineering-oriented universities. Univ.24, Univ.64, Univ.68, and Univ.69, which were engineering-oriented universities, did not have well-established systems and organizations, but technology transfer was relatively active. These universities are expected to have more active technology transfer if they improve their institutions and organizations. The 37 universities in the infant stage had relatively low scores in all perspectives. Therefore, it is necessary to strengthen the TTO for technology transfer by reorganizing the infrastructure and replenishing manpower.

The implications obtained through this study are as follows. First, technology transfer barriers, which are the main factors hindering technology transfer, were redefined. Previous studies that defined technology barriers were unable to comprehensively present technology barriers by only deriving technology barriers from a specific perspective. In this study, barriers to technology transfer reflecting various perspectives were extracted through extensive literature research. Second, most studies related to technology transfer had been focused on technology users, but in this study, it has been focused on technology donors. It is important to select technology donors from the viewpoint of a technology user. However, it is also important to increase the efficiency of technology transfer through various knowledge and support systems of technology donor. By presenting the diagnosis framework based on evaluation of technology donor, it is expected that it will be possible to activate technology transfer through the development of technology donors. Third, CSFs and PMs directly linked to the success of technology transfer were derived. CSFs that were directly related to the success of technology transfer were derived based on the BSC. Through the CSFs, universities can develop strategies to activate technology transfer. Fourth, the aggregation and normalization method that derived the score for each perspective of the university was presented and applied. Since what can be measured can be improved, the score allows universities to identify where they are lacking as technology transfer donors.

### Limitations

This study has some limitations. First, it only focused on domestic universities and conducted evaluations on some of them. There are 143 universities and 138 public research institutes in Korea that provide technology transfer, but due to time and physical limitations, this study only evaluated some domestic universities using the framework derived from this study. A comprehensive survey will be needed to evaluate all technology donors. Second, although evaluations were conducted on technology donors, it was not possible to evaluate whether technology donors who received high scores have actually successfully transferred their technology. Since evaluating technology transfer cannot be done in a short period of time, this study did not carry out such an assessment of technology transfer, but it would be worthwhile to confirm it in the long run in future research. Third, although there are various forms, such as university-company, university-university, and intra-university technology transfer, only technology transfer between universities and corporations was able to diagnosed based on framework of this study. Therefore, the subject of this research was limited solely to university-company technology transfers. Finally, a mathematical method is needed to validate the CSFs of technology transfer. In previous studies, some CSFs had been validated. The effect of individual CSFs on technology transfer had been validated based on statistical method. However, studies on how various CSFs interact with each other to affect technology transfer are lacking. As this study focused on performance evaluation, it was not statistically tested. However, if the CSFs presented in this study is mathematically verified, it will be possible to increase the reliability of the influencing CSFs affecting technology transfer.

### Author Contributions

**Conceptualization:** Jongyi Hong.

**Data curation:** Jeonghwa Cha.

**Investigation:** Kyungbo Park.

**Methodology:** Bilegjargal G.

**Software:** Kyungbo Park.

**Supervision:** Jongyi Hong.

**Validation:** Jeonghwa Cha.

**Visualization:** Jeonghwa Cha.

**Writing – original draft:** Bilegjargal G.

**Writing – review & editing:** Jongyi Hong, Kyungbo Park.

## References

1. Roxas SA, Piroli G, Mario S. Efficiency and evaluation analysis of a network of technology transfer brokers. *Technology Analysis & Strategic Management*. 2011. Vol. 23, Issue 1.
2. Mojaveri HS, Hamid EN, Hossein F. A New Model for Overcoming Technology Transfer Barriers in Iranian Health System. *International Journal of Trade, Economics and Finance*. Vol. 2, No.4, August 2011.
3. Sexton K, John LA. Looking at environmental justice from an environmental health perspective. *Journal of Exposure Analysis and Environmental Epidemiology*. 1999. Vol. 9, pp.3–8. <https://doi.org/10.1038/sj.jea.7500021> PMID: 10189622
4. Bozeman B. Technology transfer and public policy: a review of research and theory. *Research Policy*. 2000. 29 (4–5), pp.627–655.
5. Günzel A. Research on Effectiveness of Technology Transfer from a Knowledge Based Perspective. *Procedia—Social and Behavioral Sciences*. Vol. 207, 20 October 2015, pp.777–785.
6. Alor GH, Olmedo AJS. BPIMS-WS: a service-oriented architecture for trading partners integration. *IEEE International Conference on Web Services (ICWS'05) 2005*, pp.790.
7. Guan JCh, Yam CM, Mok ChK, Ma N. A study of the relationship between competitiveness and technological innovation capability based on DEA models. *European Journal of Operational Research*. Vol. 170, Issue 3. 1 May 2006, pp.971–986.
8. Perkmann M, Tartari V, McKelvey M, Autio E, Broström A, D'Este P, et al., Academic engagement and commercialisation: A review of the literature on university–industry relations. *Research Policy*. Vol. 42, Issue 2. March 2013, pp.423–442.
9. Cutrell JD. Technology transfer systems for the coming decade. Federal Highway Administration: Department of Transportation. Washington DC. 1990.
10. Owen SJ, Powell WW. Knowledge networks as channels and conduits: The effects of spillovers in the Boston biotechnology community. *Organization Science*. 2004. 15(1), pp.5–22
11. Kodama M. How Japanese high-tech companies achieved rapid innovation via strategic community networks. *Strategy & Leadership*. 2005. 33(6), pp.39–47
12. Albert R, Barabasi A. Topology of evolving networks: Local events and universality. *Physical Review Letter*. 2000. 85(24), pp.5234–5237 <https://doi.org/10.1103/PhysRevLett.85.5234> PMID: 11102229
13. Curley D. Intellectual property licences and technology transfer: a practical guide to the new European licensing regime. Elsevier. 2004.
14. Kim HE. The role of the patent system in stimulating innovation and technology transfer for climate change. Nomos Verlagsgesellschaft mbH & Co. KG. 2011.
15. Hong JY. Developing the evaluation framework for activating the technology transfer; focused on the perspectives of technology provider. Korea Institute of Technology Innovation Conference. 2019, 387–393.
16. Dwitya KA, Ali JA, Dawei L. The new inclusive role of university technology transfer: Setting an agenda for further research. *International Journal of Innovation Studies*. 5 (2021), pp.9–22
17. Samia B, Zied F, Anis K, Rebai D. US foreign investments: Technology transfer, relative backwardness, and the productivity growth of host countries. *The Quarterly Review of Economics and Finance*. 2021.
18. Gulin I, Sonmez Turk B, Abdulhakim G, Tugrul D. Innovation leadership through technology transfer: Case of Turkish industry. *Technology in Society*. 68 (2022) 101909
19. Yatang L, Yu Q, Zhuan X. Does foreign technology transfer spur domestic innovation? Evidence from the high-speed rail sector in China. *Journal of Comparative Economics*. 49 (2021) 212–229
20. Yang L, Yujie T. A dynamic capabilities perspective on pro-market reforms and university technology transfer in a transition economy. *Technovation*. 103 (2021) 102224

21. Kim JS, Kim BK. Examining different technology transfer capabilities and their counterpart works from two different positions. *Technology in Society*. 68 (2022) 101856
22. Mohammed AF. An overview of patenting trends and technology commercialization practices in the university Technology Transfer Offices in the USA and China. *World Patent Information*. 68 (2022) 102097
23. Anders B, Enrico B. Understanding the roles and involvement of technology transfer offices in the commercialization of university research. *Technovation*. 2022.
24. Huijun Sh, Wim C, Can H. Exclusive licensing of university technology: The effects of university prestige, technology transfer offices, and academy-industry collaboration. *Research Policy*. 51 (2022) 104372
25. Kaihua Ch, Chao Zh, Ze F, Yi Zh, Lutaon N. Technology transfer systems and modes of national research institutes: evidence from the Chinese academy of sciences. *Research Policy*. 51 (2022) 104471
26. Haneul Ch, Hyunjung Y, Donald S, David AW, Marie SM. Assessing differences between university and federal laboratory postdoctoral scientists in technology transfer. *Research Policy*. 51 (2022) 104456
27. Friedman J, Silberman J. University technology transfer: Do incentives, management, and location matter? *Journal of Technology Transfer*. 2003. 28 (1), pp.17–30.
28. Hsu CL, Lin JCC. What drives purchase intention for paid mobile apps?—An expectation confirmation model with perceived value. *Electronic commerce research and applications*. 2015. 14(1), pp. 46–57.
29. Kumar R, Singh RK, Shankar R. CSFs for implementation of supply chain management in Indian small and medium enterprises and their impact on performance. *IIMB Management review*. 2015. 27 (2), pp.92–104.
30. Link AN, Siegel DS. Generating science-based growth: an econometric analysis of the impact of organizational incentives on university–industry technology transfer. *Euro Journal of Finance*. 2005. 11 (3), pp.169–181.
31. Siegel DS, Waldman D, Link A. Assessing the impact of organizational practices on the relative productivity of university technology transfer offices: An exploratory study. *Research Policy*. 2003. 32 (1), pp.27–48.
32. Karla GC, Araceli HG. Defining strategies to improve the success of technology transfer efforts: An integrated tool for risk assessment. *Technology in Society*. 64 (2021) 101517
33. Thiago JS, Ana LVT. TTO's staff and technology transfer: Examining the effect of employees' capabilities. *Technovation*. 102 (2021) 102213
34. Geoffrey A, Kathleen C, Sam P, Sophie J, Seppe V. An inside-out perspective on stakeholder management in university technology transfer offices. *Technological Forecasting and Social Change*. 175 (2022) 121291
35. Bar-Zakay SN. Policymaking and technology transfer: The need for national thinking laboratories. *Policy Sciences*. 1971. 2(3), pp.213–227.
36. Choi JH, Kim HS. Keyword Network Analysis for Technology Forecasting. *Journal of Intelligence and Information Systems*. 2009. 17(4), pp.227–240
37. Dawes SS, Gharawi MA, Burke GB. Transnational public sector knowledge networks: Knowledge and information sharing in a multi-dimensional context. *Government information quarterly*. 2012. 29, pp.112–120.
38. Jagoda KI. A stage-gate model for planning and implementing international technology transfer. Australia: University of Western Sydney. 2007.
39. Cavalheiro GM, Joia LA. Towards a heuristic frame for transferring e-government technology. *Government Information Quarterly*. 2014. 31(1), pp.195–207.
40. Dardak RA, Adham KA. Transferring agricultural technology from government research institution to private firms in Malaysia. *Procedia-Social and Behavioral Sciences*. 2014. 115, pp.346–360.
41. Myller G, Joao K, Regina P, Gilberto Z. Offset policy and the process of technology transfer: A case research in Brazilian public health. *Journal of Engineering and Technology Management*. 61 (2021) 101633
42. Dennett A. Quantifying the effects of economic and labour market inequalities on inter-regional migration in Europe—a policy perspective. *Applied Spatial Analysis and Policy*. 2014. 7(1), pp.97–117.
43. Lemma WA. Analysis of smallholder farmers' perceptions of climate change and adaptation strategies to climate change: the case of Western Amhara Region, Ethiopia. Doctoral Thesis. University of South Africa. 2016.

44. Zhang C, Yan J. CDM's influence on technology transfers: A study of the implemented clean development mechanism projects in China. *Applied Energy*. 2015. 158, pp.355–365.
45. Sung TK. Technology transfer in the IT industry: A Korean perspective. *Technological Forecasting and Social Change*. 2009. 76(5), pp.700–708.
46. Zhu G, Tan KY. Foreign direct investment and labor productivity: New evidence from China as the host. *Thunderbird International Business Review*. 2000. 42(5), pp.507–528.
47. Rico A, Aminou A, Miroslava B, Haritini Ts, Jan B. An extended Canvas business model: A tool for sustainable technology transfer and adoption. *Technology in Society*. 68 (2022) 101901
48. Amanda O, Emrah K, Frauke U. Enabling the transition to a fossil-free steel sector: The conditions for technology transfer for hydrogen-based steelmaking in Europe. *Energy Research & Social Science*. 84 (2022) 102384
49. Xiaotao L, Xiaodong Y. Tracing the technology transfer of battery electric vehicles in China: A patent citation organization network analysis. *Energy*. 239 (2022) 122265
50. Kwadwo OS, Roine L. International technology transfer through projects: A social construction of technology perspective. *International Journal of Project Management*. 39 (2021), pp.902–914
51. Megumi T, Koichi N, Mari Y, Terumasa M, Toshihiko M, Kosuke Ket al., Nurturing entrepreneurs: How do technology transfer professionals bridge the Valley of Death in Japan? *Technovation*. 109 (2022) 102161
52. Henry E, Chunyan Zh. Licensing life: The evolution of Stanford University's technology transfer practice. *Technological Forecasting & Social Change*. 168 (2021) 120764
53. Harris D, Harris F. Evaluating the transfer of technology between application domains: a critical evaluation of the human component in the system. *Technology in Society*. 26 (2004), pp.551–565
54. Comerford K. R&D and Licensing: Building value through intellectual assets. Elsevier. 2007.
55. Seiford LM, Zhu J. Profitability and marketability of the top 55 US commercial banks. *Management science*. 1999. 45(9), pp.1270–1288.
56. Huang CY, Kao YS, Lu HH, Wu MJ. Curriculum development for enhancing the imagination in the technology commercialization process. *Eurasia Journal of Mathematics, Science and Technology Education*. 2017. 13(9), pp.6249–6283.
57. Cheng EWL, Li H. Contractor selection using the analytic network process. *Construction Management and Economics*. 2004. 22(10), pp.1021–1032. <https://doi.org/10.1080/0144619042000202852>
58. Cook DA, Levinson AJ, Garside S. Time and learning efficiency in Internet-based learning: a systematic review and meta-analysis. *Advances in health sciences education*. 2010. 15, pp.755–770. <https://doi.org/10.1007/s10459-010-9231-x> PMID: 20467807
59. Kao C. Network data envelopment analysis: A review. *European journal of operational research*. 2014. 239(1), pp.1–16.
60. Liu JG, Xuan ZG, Dang YZ, Guo Q, Wang ZT. Weighted Network Properties of Chinese Nature Science Basic Research, *Physica A: Statistical Mechanics and its Applications*. 2007. 377(1), pp.302–314.
61. Hartmann GB, Masten J. Profiles of state technological transfer structure and its impact on small manufacturers. *The Journal of Technology Transfer*. 2000. 25(1), pp.83–88.
62. Amy HI, Lee WM, Lin TsM. An evaluation framework for technology transfer of new equipment in the high technology industry. *Technological Forecasting & Social Change*. 77 (2010), pp.135–150
63. Judith E, Tugrul D, Amir Sh. R&D project evaluation: Technology transfer focus. *The Electricity Journal*. 34 (2021) 106904
64. Jaffe AB, Lerner J. Reinventing public R&D: Patent policy and the commercialization of national laboratory technologies. *RAND Journal of Economics*. 2001, pp.167–198.
65. Beise M, Stahl H. Public research and industrial innovations in Germany. *Research policy*. 1999. 28 (4), pp.397–422.
66. Siegel DS, Veugelers R, Wright M. Technology transfer offices and commercialization of university intellectual property: Performance and policy implications. *Oxford Review of Economy Policy*. 2007. 23 (4), pp.640–660.
67. Dongfu FL, Xiaoqing MF. The Efficiency of University Technology Transfer in China, *Asian Economic Papers* 20:3. 05 January 2022. [https://doi.org/10.1162/asep\\_a\\_00838](https://doi.org/10.1162/asep_a_00838)
68. Cohen WM, Nelson RR, Walsh JP. Links and impacts: the influence of public research on industrial R&D. *Management science*. 2000. 48(1), pp.1–23.
69. Scotchmer. *Innovation and incentives*. MIT press. 2004



70. Steinlin M. The cerebellum in cognitive processes: supporting studies in children. *The Cerebellum*. 2007. 6(3), pp.237–241. <https://doi.org/10.1080/14734220701344507> PMID: 17786820
71. Sung TK, Carlsson B. An international comparison of technological systems: The case of CNC machine tools in Korea, Sweden, and USA. *Asian Journal of Technology Innovation*. 2004. 12(2), pp.21–46.
72. De Moortel K, Crispeels T. International university-university technology transfer: Strategic management framework. *Technological Forecasting and Social Change*. 2018. 135, pp.145–155.
73. Klofsten M, Fayolle A, Guerrero M, Mian S, Urbano D, Wright M. The entrepreneurial university a da river for economic growth and social change-Key strategic challenges. *Technological Forecasting and Social Change*. 2019. 141, pp.149–158.
74. Benneworth P. *University Engagement with Socially Excluded Communities*. University Engagement with Socially Excluded Communities. Dordrecht: Springer. 2013. <https://doi.org/10.1007/978-94-007-4875-0>
75. OECD. *Patents and Innovation: Trends and Policy Challenges*. Organization for Economic Co-operation and Development. 2004. 12, pp.32.
76. Yusof M, Jain KK. Categories of university-level entrepreneurship: a literature survey. *International Entrepreneur Management Journal*. 2010. 6(1), pp.81–96. <https://doi.org/10.1007/s11365-007-0072-x>
77. Hayter CS. Harnessing university entrepreneurship for economic growth: factors of success among university spin-offs. *Economic Development Quality*. 2013. 27(1), pp.18–28. <https://doi.org/10.1177/0891242412471845>
78. Payumo JG, et al., An entrepreneurial, research-based university model focused on intellectual property management for economic development in emerging economies: The case of Bogor Agricultural University, Indonesia. *World Patent Information*. Elsevier. 2014. 36(1), pp.22–31.
79. Miller K, McAdam K, McAdam R. A systematic literature review of university technology transfer from a Quadruple helix perspective: towards a research agenda. *R&D Management*. 2016. 48(1), pp.7–24. <https://doi.org/10.1111/radm.12228>
80. Carayannis EG, et al., The ecosystem as helix: an exploratory theory-building study of regional cooperative entrepreneurial ecosystems as Quadruple/Quintuple Helix Innovation Models. *R&D Management*. 2018. 48(1), pp.148–162. <https://doi.org/10.1111/radm.12300>
81. Gianiodis PT, Meek WR, Chen W. The political climate and academic entrepreneurship: the case of strange bedfellows? *Journal of Business Venturing Insights*. Elsevier Ltd. 12(April) 2019. Article e00135. <https://doi.org/10.1016/j.jbvi.2019.e00135>
82. Cinar R, Benneworth P. Why do universities have a little systemic impact on social innovation? An institutional logic perspective. *Growth Change*. 2020, pp.1–19. <https://doi.org/10.1111/grow.12367>
83. Aldridge TT, et al., Scientist Entrepreneurship across Scientific Fields. *Universities and the Entrepreneurial Ecosystem*. 2017, pp.67–84. <https://doi.org/10.1007/s10961-014-9339-x>
84. Sauermann H, Stephan P. Conflicting logics? A multidimensional view of industrial and academic science. *Organization science*. 2013. 24(3), pp.889–909.
85. Heringa PW, Horlings E, van der Zouwen M, van den Besselaar P, van Vierssen W. How do dimensions of proximity relate to the outcomes of collaboration? A survey of knowledge-intensive networks in the Dutch water sector. *Economics of innovation and new technology*. 2014. 23(7), pp.689–716.
86. Knoblen J, Oerlemans LA. Proximity and inter-organizational collaboration: A literature review. *International Journal of Management reviews*. 2006. 8(2), pp.71–89.
87. Balland PA. Proximity and the evolution of collaboration networks: evidence from research and development projects within the global navigation satellite system (GNSS) industry. *Regional studies*. 2012. 46(6), pp.741–756.
88. Broekel T, Balland PA, Burger M, Van Oort F. Modeling knowledge networks in economic geography: a discussion of four methods. *The annals of regional science*. 2014. 53(2), pp.423–452.
89. Boschma R. Role of proximity in interaction and performance: Conceptual and empirical challenges. 2005.
90. Huber PJ. Robust statistics. In *International encyclopedia of statistical science*. Springer. Berlin. Heidelberg. 2011, pp.1248–1251
91. Mattes J. Dimensions of proximity and knowledge bases: Innovation between spatial and non-spatial factors. *Regional Studies*. 2012. 46(8), pp.1085–1099.
92. Nooteboom B, Van Haverbeke W, Duysters G, Gilsing V, Van den Oord A. Optimal cognitive distance and absorptive capacity. *Research policy*. 2007. 36(7), pp.1016–1034.
93. Aguilera RV, Crespi-Cladera R. Firm family firms: Current debates of corporate governance in family firms. *Journal of Family Business Strategy*. 2012. 3(2), pp.66–69.

94. Broekel T, Boschma R. Knowledge networks in the Dutch aviation industry: the proximity paradox. *Journal of economic geography*. 2012. 12(2), pp.409–433.
95. Capaldo A, Petruzzelli AM. Partner geographic and organizational proximity and the innovative performance of knowledge-creating alliances. *European Management Review*. 2014. 11(1), pp.63–84.
96. D'Este P, Guy F, Iammarino S. Shaping the formation of university–industry research collaborations: what type of proximity does really matter? *Journal of economic geography*. 2013. 13(4), pp.537–558.
97. Hong W, Su YS. The effect of institutional proximity in non-local university–industry collaborations: An analysis based on Chinese patent data. *Research Policy*. 2013. 42(2), pp.454–464.
98. Rosenkopf L, Almeida P. Overcoming local search through alliances and mobility. *Management science*. 2003. 49(6), pp.751–766.
99. Slavtchev V. Proximity and the transfer of academic knowledge: Evidence from the spatial pattern of industry collaborations of East German professors. *Regional Studies*. 2013. 47(5), pp.686–702.
100. Autant-Bernard C, Billand P, Frachisse D, Massard N. Social distance versus spatial distance in R&D cooperation: Empirical evidence from European collaboration choices in micro and nanotechnologies. *Papers in regional Science*. 2007. 86(3), pp.495–519.
101. Hoekman J, Frenken K, Tijssen RJ. Research collaboration at a distance: Changing spatial patterns of scientific collaboration within Europe. *Research policy*. 2010. 39(5), pp.662–673.
102. Bruneel J, d'Este P, Salter A. Investigating the factors that diminish the barriers to university–industry collaboration. *Research policy*. 2010. 39(7), pp.858–868.
103. Lim CY, Lee YJ. An analysis for success factors of technology transfer: From GRIs perspective. 2007–05.
104. Ockwell D, Byrne R. Improving technology transfer through national systems of innovation: climate relevant innovation-system builders (CRIBs). *Climate Policy*. 2016. 16(7), pp.836–854.
105. Belitski M, Aginskaja A, Marozau R. 'Commercializing university research in transition economies: technology transfer offices or direct industrial funding? *Research Policy*. Elsevier. 2019. 48(3), pp.601–615. <https://doi.org/10.1016/j.respol.2018.10.011>
106. Wright M, et al., 'Mid-range universities' linkages with industry: knowledge types and the role of intermediaries. *Research Policy*. 2008. 37(8), pp.1205–1223.
107. Yuan CY, Li CO, Vlas MW, Peng. Dynamic capabilities, subnational environment, and university technology transfer. *Strategy of Organization*. 16 (1) (2018), pp.35–60.
108. Zaichenko S. The human resource dimension of science-based technology transfer: lessons from Russian RTOs and innovative enterprises. *Journal of Technology Transfer*. 2018. 43 (2), pp.368–388.
109. Fischer BB, Fischer BB, Schaeffer PR, Schaeffer PR, Vonortas NS, Vonortas NS, et al., Quality comes first: university-industry collaboration as a source of academic entrepreneurship in developing countries. *Journal of Technology Transfer*. 2018. 43 (2), pp.263–284.
110. Owen SJ, Powell WW. The expanding role of university patenting in the life sciences: assessing the importance of experience and connectivity. *Research Policy*. 2003. 32 (9), pp.1695–1711.
111. Hess S, Siegwart RY. University technology incubator: technology transfer of early-stage technologies in cross-border collaboration with industry. *Business Management Research*. 2013. 2 (2), pp.22–36.
112. Schoen A, Potterie BVP, Henkel J. Governance typology of universities' technology transfer processes. *Journal of Technology Transfer*. 2014. 39 (3), pp.435–453.
113. Caldera A, Debande O. Performance of Spanish universities in technology transfer: an empirical analysis. *Research Policy*. 2010. 39 (9), pp.1160–1173.
114. Guerrero M, Cunningham JA, Urbano D. The economic impact of entrepreneurial universities' activities: an exploratory study of the United Kingdom. *Research Policy*. 2015. 44 (3), pp.748–764.
115. Baldini N. Implementing Bayh–Dole-like laws: faculty problems and their impact on university patenting activity. *Research Policy*. 2009. 38 (8), pp.1217–1224.
116. Jain S, George G, Maltarich M. Academics or entrepreneurs? Investigating role identity modification of university scientists involved in commercialization activity. *Research Policy*. 2009. 38 (6), pp.922–935.
117. Balven R, Fenters V, Siegel DS, Waldman D. Academic entrepreneurship: the roles of identity, motivation, championing, education, work-life balance, and organizational justice. *Academic Management Perspectives*. 2018. 32 (1), pp.21–42.
118. Clarysse B, Mosey S, Lambrecht I. New trends in technology management education: a view from Europe. *Academic Management Learning Education*. 2009. 8 (3), pp.427–443.
119. Mian SA. Assessing value-added contributions of university technology business incubators to tenant firms. *Research Policy*. 1996. 25 (3), pp.325–335.

120. Rothaermel FT, Thursby M. University–incubator firm knowledge flows: assessing their impact on incubator firm performance. *Research Policy*. 2005. 34 (3), pp.305–320.
121. Kaplan RS, Norton DP. Using the balanced scorecard as a strategic management system. *Harvard Business Review*. 1996a. 74(1), pp.75–85.
122. Joshi K, Sarker S. Knowledge transfer among face-to-face information systems development team members: Examining the role of knowledge, source, and relational context. *Proceedings of the 37th Hawaii International Conference on System Sciences*. 2004.
123. Joshi D, Gatica PD. Discovering Groups of People in Google News. *Proceedings of the 1st ACM international workshop on Human-centered multimedia*. 2006.
124. Berbegal MJ, Ribeiro SDE, Garcya JLS. Can a magic recipe foster university spin-off creation? *Journal of Business Research*. 2015. 68(11), pp.2272–2278.
125. Dolmans SA, Shane S, Jankowski J, Reymen IM, Romme AGL. The evaluation of university inventions: Judging a book by its cover? *Journal of Business Research*. 2016. 69(11), pp.4998–5001.
126. Kreiling L, Serval S, Peres R, Bounfour A. University technology transfer organizations: Roles adopted in response to their regional innovation system stakeholders. *Journal of Business Research*. 2020. 119, pp.218–229.
127. Austin RB, Matthew SW, David JS. Discovery sells, but who's buying? An empirical investigation of entrepreneurs' technology license decisions. *Journal of Business Research*. 144 (2022), pp.403–415
128. Kumaraswamy MM, Shrestha GB. Targeting 'technology exchange' for faster organizational and industry development. *Building Research & Information*. 2002. 30(3), pp.183–195.
129. Kyootai L, Hyun JJ. Does TTO capability matter in commercializing university technology? Evidence from longitudinal data in South Korea. *Research Policy*. 50 (2021) 104133
130. Park K, Lee K. The impacts of government research funds on technology transfers from universities: a longitudinal study on Korean universities. *Journal of Technology Innovation*. 2020. 28 (1), pp.1–30 (in Korean).
131. Yazdani K, Rashvanlouei KY, Ismail K. Ranking of technology transfer barriers in developing countries; case study of Iran's biotechnology industry. In *2011 IEEE International Conference on Industrial Engineering and Engineering Management*. December 2011, pp. 1602–1606.
132. Kogut B, Zander U. Knowledge of the firm, combinative capabilities, and the replication of technology. *Organization science*. 1992. 3(3), pp.383–397.
133. Gerstetter C, Marcellino D. The Current Proposals on the Transfer of Climate Technology in the International Climate Negotiations. *An Assessment*. 2009.
134. Rockart JF. Chief executives define their own data needs. *Harvard business review*. 1979. 57 (2), pp.81–93. PMID: [10297607](https://pubmed.ncbi.nlm.nih.gov/10297607/)
135. Boynton AC, Zmud RW. An assessment of CSFs. *Sloan management review*. 1984. 25(4), pp.17–27.
136. Gradi M. The right of access to information and evidence and the duty of truthful disclosure of parties in comparative perspective. *Studies of the Max Planck Institute Luxembourg for International, European and Regulatory Procedural Law*. 2015. 4.
137. Powell WW, Koput KW, Smith-Doerr L. Interorganizational collaboration and the locus of innovation: Networks of learning in biotechnology. *Administrative science quarterly*. 1996, pp.116–145.
138. Agrawal A. Engaging the inventor: Exploring licensing strategies for university inventions and the role of latent knowledge. *Strategic Management Journal*. 2006. 27(1), pp.63–79.
139. Schaeffer V, Ocalan OS, Penin J. The complementarities between formal and informal channels of university–industry knowledge transfer: A longitudinal approach. *The Journal of Technology Transfer*. 2020. 45(1), pp.31–55.
140. Thursby JG, Jensen R, Thursby MC. Objectives, characteristics and outcomes of university licensing: A survey of major US universities. *The Journal of Technology Transfe*. 2001. 26(1–2), pp.59–72.
141. Galan MV, Plewa C. What drives and inhibits university–business cooperation in Europe? A comprehensive assessment. *R&D Management*. 2016. 46(2), pp.369–382.
142. Markman GD, Gianiodis PT, Phan PH, Balkin DB. Entrepreneurship from the Ivory tower: do incentive systems matter? *Journal of Technology Transfer*. 2004. 29 (3–4), pp.353–364.
143. Bolzani D, Munari F, Rasmussen E, Toschi L. Technology transfer offices as providers of science and technology entrepreneurship education. *The Journal of Technology Transfer*. 2021. 46(2), pp.335–365.
144. Morgan EJ, Crawford N. Technology broking activities in Europe—a survey. *International Journal of Technology Management*. 1996. 12(3), pp.360–367.

145. Yan E, Ding Y. Applying Centrality Measures to Impact Analysis: A Co authorship Network Analysis. *Journal of the American Society for Information Science and Technology*. 2009. 60(10), pp.2107–2118
146. Bryant RL. Power, knowledge and political ecology in the third world: a review. *Progress in physical geography*. 1998. 22(1), pp.79–94.
147. Farizah BM, Shashazrina BR. CSFs (CSFs) on technology transfer effectiveness in manufacturing industry: a critical review. *International Journal of Business, Economics and Law*. 2012. Vol. 1 ISSN 2289-1552
148. Huynh TT. Exploring factors influencing technology transfer capability: constructing a model through grounded theory. *International Journal of Technology Management and Sustainable Development*. 2018. Vol. 17 No. 1, pp.49–64.
149. Pagani RN, Ramond B, Da Silva VL, Zammar G, Kovaleski JL. Key factors in university-to-university knowledge and technology transfer on international student mobility. *Knowledge Management Research and Practice*. 2020. Vol. 18 No. 4, pp.405–423.
150. Chis DM, Crisan EL. A framework for technology transfer success factors: validation for the Graphene for Life project. *Journal of Science and Technology Policy Management*. 2020. Vol. 11 No. 2.
151. Lopez MX, Mauricio D. Factors of technology transfer and its relation to success. *International Journal of Business and Systems Research*. 2021. Vol. 15 No.2, pp. 227–252.
152. Lager T, Hassan BH. Managing inter-firm process technology transfer: success factors and organizational perspectives. *International Journal of Innovation Management*. 2021. Vol. 25 No.2, p. 2150018.
153. Parmenter D. *Key Performance Indicators: Developing, Implementing, and Using Winning KPIs*. John Wiley and Sons. 2015.
154. Sadeghi A, Azar A, Rad RS. Developing a fuzzy group AHP model for prioritizing the factors affecting the success of high-tech SMEs in Iran: a case study. *Procedia–Social and Behavioral Sciences*. 2012. Vol. 62, pp.957–961.
155. Wu FF, Yang Z, Huang LC, Qiao Z. Factors analysis and countermeasure research of influencing technology transfer across the industry. 2014 Portland International Conference on Management of Engineering and Technology (PICMET). 2014.
156. Luthra S, Garg D, Haleem A. An analysis of interactions among CSFs to implement green supply chain management towards sustainability: An Indian perspective. *Resources Policy*. 2015. <https://doi.org/10.1016/j.resourpol.2014.12.006> (Accessed on: August 12, 2015).
157. Olson EM, Slater SF. The balanced scorecard, competitive strategy, and performance. *Business Horizons*. 2002. 45(3), pp.11–16.
158. Elbanna S, Kamel H, Fatima T, Eid R. An investigation of the causality links in the balanced scorecard: The case of the Gulf Cooperation Council hospitality industry. *Tourism Management Perspectives*. 2022. 41, 100934.
159. Ernst Young LLP. *Measures that Matter*. Cambridge, MA: Ernst & Young Centre for Business Innovation. 1998.
160. Tawse A, Tabesh P. Thirty years with the balanced scorecard: What we have learned. *Business Horizons*. 2022.
161. Kaplan RS, Norton DP. “The Balanced Scorecard—Measures That Drive Performance. *Harvard Business Review*. 1992. 70, pp.71–79. PMID: [10119714](https://pubmed.ncbi.nlm.nih.gov/10119714/)
162. Kaplan RS, Norton DP. Linking the balanced scorecard to strategy. *California Management Review*. 1996b. 39(1), pp.53–79.
163. Mathiyalagan PK, Tamil MP, Parthiban. Performance Evaluation in supply Chain using Balanced Scorecard. *International Journal of Advanced Mechanic Auto Engineering*. 2014. 1–1.
164. Prakash KB, Mysamy M, Nithish PM, Kumar R, Anand K. Investigating thermal properties of Nanoparticle Dispersed Paraffin (NDP) as phase change material for thermal energy storage. *Material of Today-Product*. 2020. <https://doi.org/10.1016/j.matpr.2020.02.800>
165. Manoj KP, Anandkumar RD, Sudarvizhi K, Mysamy MN. Experimental and Theoretical Investigations on Thermal Conductivity of the Paraffin Wax using CuO Nanoparticles. *Material of Today-Product*. 22 (2020), pp.1987–1993. <https://doi.org/10.1016/j.matpr.2020.03.164>
166. Carlsson B, Fridh AC. Technology transfer in United States universities. *Journal of Evolution Economy*. 2002. 12 (1–2), pp.199–232.
167. Heisey PW, Adelman SW. Research expenditures, technology transfer activity, and university licensing revenue. *Journal of Technology Transfer*. 2011. 36 (1), pp.38–60.
168. Powers JB. Commercializing academic research: resource effects on the performance of university technology transfer. *Journal of Higher Education*. 2003. 74 (1), pp.26–50.

169. Rogers EM, Yin J, Hoffmann J. Assessing the effectiveness of technology transfer offices at US research universities. *Journal of Association University Technology Management*. 2000. 12 (1), pp.47–80.
170. Baldini N, Grimaldi R, Sobrero M. To patent or not to patent? A survey of Italian inventors on motivations, incentives, and obstacles to university patenting. *Scientometrics*. 2007. 70 (2), pp.333–354.
171. Belenzon S, Schankerman M. University knowledge transfer: private ownership, incentives, and local development objectives. *Journal of Law Economy*. 2009. 52 (1), pp.111–144.
172. Lach S, Schankerman M. Royalty sharing and technology licensing in universities *Journal of European Economy Association*. 2004. 2 (2–3), pp.252–264.
173. Macho SI, Perez CD, Veugelers R. Licensing of university inventions: the role of a technology transfer office. *Int. Journal of Industry and Organization*. 2007. 25 (3), pp.483–510.
174. Adams JD, Chiang EP, Jensen JL. The influence of federal laboratory R&D on industrial research. *Review of Economy Statistic*. 2003. 85 (4), pp.1003–1020.
175. Park JB, Ryu TK, Gibson DV. Facilitating public-to-private technology transfer through consortia: initial evidence from Korea. *Journal of Technology Transfer*. 2010. 35 (2), pp.237–252.
176. Foltz J, Barham B, Kim K. Universities and agricultural biotechnology patent production. *Agro business*. 2000. 16 (1), pp.82–95.
177. Abramo G, D'Angelo C, Di Costa F. University-industry research collaboration: a model to assess university capability. *Higher Education*. 2011. 62 (2), pp.163–181.
178. Neely A. The Evolution of Performance measurement Research Development in the Last Decade and a Research Agenda for the Next. *International Journal Operation Production Management*. 2008. 25, pp.1264–1277.
179. Lohman C, Fortuin L, Wouters M. Designing a Performance measurement System. A Case Study of *European Journal of Operation Research*. 2004. 156, pp.267–286.
180. Hill T. Teaching Manufacturing Strategy. *International Journal of Operation Production Management*. 1986. 6, pp.10–20.
181. Bititci U, Garengo P, Dofler V, Nudurupati S. Performance measurement Challenges for Tomorrow. *International Journal of Management Review*. 2012. 14, pp.305–327.
182. Folan P, Browne JA. Review of Performance measurement towards Performance Management. *Computing Industry*. 2005. 56, pp.663–680.
183. Neely A, Gregory M, Platts K. Performance measurement System Design: A Literature Review and Research Agenda. *International Journal of Operation Production Management*. 2005. 25, pp.1228–1263.
184. Poister T. *Measuring Performance in Public and Nonprofit Organization*. Jossey-Bass: San Francisco CA. USA. 2003.
185. Waal A, Geodegebuure R, Geradts P. The Impact of Performance Management on the Result of a Non-Profit Organization. *International Journal of Production Performance Management*. 2011. 60, pp.778–796.
186. Triantaphyllou E, Shu B, Sanchez SN, Ray T. Multi-criteria decision making: an operations research approach. *EEEE* 1998. 15, pp.175–86.
187. Saaty TL. *Decision making with dependence and feedback: the analytic network process*. RWS Publication. 1996. vol. 4922.
188. Mu E, Cooper O, Peasley M. Best practices in analytic network process studies. *Expert Systems with Applications*. 2020. 159. Article 113536. <https://doi.org/10.1016/j.eswa.2020.113536>
189. Saaty TL. *Theory and applications of the analytic network process: Decision making with benefits, opportunities, costs, and risks*. Pittsburgh PA: RWS Publications. 2005.
190. Hargadon A, Sutton RI. Technology brokering and innovation in a product development firm. *Administrative science quarterly*. 1997, pp.716–749.
191. Lin L, Kulatilaka N. Network effects and technology licensing with a fixed fee, royalty, and hybrid contracts. *Journal of Management Information Systems*. 2006. 23(2), pp.91–118
192. Tohumcu Z, Karasakal E. R&D project performance evaluation with multiple and interdependent criteria. *IEEE Transactions on Engineering Management*, 2010. 57(4), pp.620–633.
193. Wang D, Li K, Fang S. Analyzing the factors influencing trust in a construction project: Evidence from a Sino-German Eco-Park in China. *Journal of Civil Engineering and Management*. 2018. 24(4), pp.331–343. <https://doi.org/10.3846/jcem.2018.3069>
194. Buyukozkan G, Ozturkcan D. An integrated analytic approach for Six Sigma project selection. *Expert Systems with Applications*. 2010. 37(8), pp.5835–5847. <https://doi.org/10.1016/j.eswa.2010.02.022>

195. Cao J, Song W. Risk assessment of co-creating value with customers: A rough group analytic network process approach. *Expert Systems with Applications*. 2016. 55, pp.145–156. <https://doi.org/10.1016/j.eswa.2016.02.012>
196. Yang ChH, Wei H, Wu YL. A hybrid multiple-criteria decision portfolio with the resource constraints model of a smart healthcare management system for public medical centers. *Socio-Economic Planning Sciences*. 80 (2022) 101073
197. Saaty TL, Vargas LG. *Decision making with the Analytic Network Process: Economic, political, social and technological applications with benefits, opportunities, costs and risks* (2nd edition). New York: Springer. 2013.
198. Intermediation Howells J. and the role of intermediaries in innovation. *Research policy*. 2006. 35 (5), pp.715–728.
199. Li Y, Juying M, Fayyaz A, Muhammad UD, Haifeng G, Abbas ACh, et al., Investigating the role of international industrial transfer and technology spillovers on industrial land production efficiency: Fresh evidence based on Directional Distance Functions for Chinese provinces. *Journal of Cleaner Production*. 340 (2022) 130814
200. Diego M. The influence of gender on technology transfer processes managed in Italian Young Innovative Companies: A stochastic frontier analysis. *Technovation*. 111 (2022) 102383
201. Rolando A, Cubillos G, Grace TC. Affordable housing and clean technology transfer in construction firms in Brazil. *Technology in Society*. 67 (2021) 101768
202. Xiangpeng L, Ying G, Jun S. Technology stocks: A study on the characteristics that help transfer public research to industry. *Research Policy*. 50 (2021) 104361
203. Sanjay K, Sunil L, Abid H, Sachin KM, Dixit G. Identification and evaluation of critical factors to technology transfer using AHP approach, *International strategic management review*. 3 (2015), pp.24–42
204. Peizhen J, Sachin KM, Malin S. The power of innovation diffusion: How patent transfer affects urban innovation quality. *Journal of Business Research*. 145 (2022), pp.414–425
205. Rafael L, Jaione G, Mikel Z. Adaptation of the MIVES method for the strategic selection of new technologies at an R&D centre. Focus on the manufacturing sector. *Technovation*. 115 (2022) 102462
206. Oliver K, Nathalie S. Exploring the role of entrepreneurial passion for facilitating university technology commercialization: Insights from battery research as an interdisciplinary field. *Journal of Engineering and Technology Management*. 60 (2021) 101627
207. Anika N, Heike J. Transfer scouts: from intermediation to co-constructors of new knowledge and technologies in Germany. *Research Policy*. 50 (2021) 104209
208. Reagans R, McEvily B. Network Structure and Knowledge Transfer: The Effects of Cohesion and Range, *Administrative Science Quarterly*. 2003. 48(2), pp.240–267
209. Changchit C. An investigation into the feasibility of using an internet-based intelligent system to facilitate knowledge transfer. *The Journal of Computer Information Systems*. 2003. 43, pp.91–99.
210. Kamol P, Rath P, Pakpachong V. Success factors of technology transfer process of entrepreneurial food SMES in Thailand. *Academy of Entrepreneurship Journal*. Volume 26. Issue 1. 2020.
211. Badruzzaman A. CSFs for Technology Transfer: Sharing a Perspective. Society of Petroleum Engineers Inc. SPE Asia Pacific Oil and Gas Conference and Exhibition Held in Jakarta, Indonesia. September 2003, pp.9-11.
212. Navid M, Jalil HD, Mohamadreza Kh. A hybrid approach for identifying and prioritizing CSFs in technology transfer projects (case study: diesel locomotive manufacturing). *Journal of Engineering, Design and Technology*. Emerald Publishing Limited. 2021, pp.1726–0531
213. Politis JD. The connection between trust and knowledge management: what are its implications for team performance, *Journal of Knowledge Management*. 2003. 7(5), pp.55–66
214. Loew R, Bleimann U, Walsh P. Knowledge broker network based on communication between humans, *Campus-Wide Information Systems*. 2004. 21(5), pp.185–190
215. Merelo JL, Cotta C. Who is the best Connected EC Researcher? Centrality Analysis of the Complex Network of Authors in Evolutionary Computation. *GECCO*. 2007.
216. Miesing P, Tang M. Chapter 3: Technology Transfer Institutions in China: A Comparison of Value Chain and Organizational Structure Perspectives. *World Scientific Reference on Innovation*. 2012, pp. 43–60
217. Miles RE, Snow CC, Mathews JA, Miles G, Coleman HJ. Organizing in the knowledge age: Anticipating the cellular form. *Academy of Management Executive*. 1997. 11(4), pp.7–24
218. Narteh B. Knowledge transfer in developed-developing country interfirm collaborations: a conceptual framework. *Journal of Knowledge Management*. 2008. 12(1), pp.78–91

219. Park SH, Lee YG. Perspectives on Technology Transfer Strategies of Korean Companies in Point of Resource and Capability Based View. *Journal of Technology Management & Innovation*. 2011. Volume 6, Issue 1.
220. Herlandí SA, Messias BS, Adriano CMR, Vanessa CGCh, Milton FCh Jr. Risk and Success Factors in Technology Transfer. *International Journal of Engineering Research and Application*. Vol. 7, Issue 9. (Part -1) September 2017, pp.66–71
221. Tang F, Mu J, MacLachlan DL. Implication of network size and structure on organizations' knowledge transfer, *Expert System with Applications*. 2008. 34, pp.1109–1114
222. Velardi P, Navigli R, Cucchiarelli A, Antonio FD. A New Content-Based Model for Social Network Analysis. *Proceedings of the 2008 IEEE International Conference on Semantic Computing*. 2008, pp.18–25
223. Harrow I, Filsell W, Woollard P, Dix I. Towards Virtual Knowledge Broker services for semantic integration of life science literature and data sources. *Review Article. Drug Discovery Today*. In Press, Corrected Proof, Available online. 12 December 2012.
224. Sun PY, Scott JL. An Investigation of Barriers to Knowledge Transfer. *Journal of Knowledge Management*. 2005. 9(2), pp.75–90
225. Xu H. A Regional University-Industry Cooperation Research Based on Patent Data Analysis. *Asian Social Science*. 2010. 6(11), pp.88–94
226. Szulanski G. The process of knowledge transfer: a diachronic analysis of stickiness. *Organizational Behaviour, and Human Decision Process*. 2000. 82(1), pp.9–27
227. Parent R, Roy M, St-Jacques D. A systems-based dynamic knowledge transfer capacity model, *Journal of Knowledge Management*. 2007. 11(6), pp.81–93
228. Wasserman S, Faust K. *Social Network Analysis: Methods and Application*, Newyork: Cambridge University Press. 1994.
229. Bou LJ, Segarra CM. Strategic knowledge transfer and its implications for competitive advantage: an integrative conceptual framework, *Journal of knowledge management*. 2006. 10(4), pp.100–112
230. Watts DJ. *Six Degrees: The Science of a Connected Age*. New York: W.W. Norton. 2003.
231. Wartburg IV, Teichert T, Rost K. Inventive progress measured by multi-stage patent citation analysis, *Research Policy*. 2005. 34(10), pp.1591–1607
232. Sean BO, Milford BG. Corporate knowledge transfer via interlocking directorates: a network analysis approach. *Geoforum*. 2004. 35(1), pp.127–139
233. Park JY. The Effect of IT Human Capability and Absorptive Capacity on Knowledge Transfer. *Journal of Information Technology Applications & Management*. 2008. 15(3), pp.209–225
234. Yoon MH. Technological Regime and the Shift of Industrial Leadership in the DRAM Industry: A Patent Citation Analysis, *the Journal of Intellectual Property*. 2011. 6(3), pp.39–270
235. Yoon BG, Park YT. Development of New Technology Forecasting Algorithm: Hybrid Approach for Morphology Analysis and Conjoint Analysis of Patent Information, *IEEE Transactions on Engineering Management*. 2007. 54 (3), pp.588–599.
236. You T, Li F, Yu Z. A Method for Evaluating the Knowledge Transfer Ability in Organization, *Lecture Notes in Computer Science*. 2006. 4, pp.92–99
237. Christian S, Barkowski A, Schramm R. Visualizing Patent Statistics using Social Network Analysis Tools, *World Patent Information*. 2008. 30, pp.115–131
238. Ariffin MM, Arshad NI, Shaarani AR, Shah AU. Implementing Knowledge Transfer Solution Through Web-Based Help Desk System, *World Academy of Science, Engineering and Technology*. 2007. Vol 21, pp.14–25
239. Zhong Q, Wang K. Knowledge network analysis within organizations based on SNA. In *Wireless communications, networking and mobile computing WiCOM '08*. 4th International Conference on. 2008. 12–14 Oct, pp.1–5
240. Ampere A, Tseng, Miroslav R. Performance Evaluations of Technology Transfer Offices of Major US Research Universities. *Journal of Technology Management Innovation*. 2014. Volume 9, Issue 1
241. Amir H, Ghasem Z. Key challenges and opportunities of service innovation processes in technology supplier-service provider partnerships. *Journal of Business Research*. 139 (2022), pp.1284–1302
242. Anne F, Anne L, Ralf E. How additive manufacturing drives business model change: The perspective of logistics service providers. *International Journal of Production Economics*. 5 May 2022.
243. Dion B, Mark VA. Competition among liquidity providers with access to high-frequency trading technology. *Journal of Financial Economics*. 140 (2021) 220–249

244. John P, Ranganathan C. Institutional factors affecting the electronic health information exchange by ambulatory providers. *Health Policy and Technology*. 10 (2021) 100569
245. Delli-Colli L, Belzile D, Gagnon Y, Couturier C, Cheminais O, Moreau NF. Integrating clinical tools in the continuum of interprofessional collaboration: The providers' perspectives of an evolving process. *Journal of Interprofessional Education & Practice*. 26 (2022) 100491
246. Oskar K, Pawel P, Emil S. Digitalization and data, institutional quality and culture as drivers of technology-based credit providers. *Journal of Economics and Business*. 2022.
247. Safa E, Onur A. How technology impacts communication between cancer patients and their health care providers: A systematic literature review. *International Journal of Medical Informatics*. 149 (2021) 104430 <https://doi.org/10.1016/j.ijmedinf.2021.104430> PMID: 33684711
248. Shuyang L, Guochao P, Fei X, Jun Zh, Bingqian Zh. Value co-creation in industrial AI: The interactive role of B2B supplier, customer, and technology provider, *Industrial Marketing Management*. 98 (2021) 105–114226.
249. Lichtenthaler U, Ernst H. Innovation intermediaries: Why internet marketplaces for technology have not yet met the expectations. *Creativity and innovation management*. 2008. 17(1), pp.14–25.
250. Ramsey E, Bond D, Hanna D, Gallagher E. Encouraging technology transfer among SMEs in the northern periphery of Europe. *Technology Analysis & Strategic Management*. 2013. 25(3), pp.341–353.
251. McMullan WE, Melnyk K. University innovation centres and academic venture formation. *R&D Management*. 1988. 18(1), pp.5–12
252. Rasmussen E, Rice MP. A framework for government support mechanisms aimed at enhancing university technology transfer: the Norwegian case. *International Journal of Technology Transfer and Commercialisation*. 2012. 11(1–2), pp.1–25.
253. York AS, Ahn MJ. University technology transfer office success factors: a comparative case study. *International journal of technology transfer and commercialization*. 2012. 11(1–2), pp.26–50.
254. Simonin BL. Ambiguity and the process of knowledge transfer in strategic alliances. *Strategic Management Journal*. 1999. 20, pp.595–623
